# Genome-wide association studies reveal differences in genetic susceptibility between single events versus recurrent events of atrial fibrillation and myocardial infarction: the HUNT study

Martina Hall<sup>1,2</sup>, Anne Heidi Skogholt<sup>2</sup>, Ida Surakka<sup>3</sup>, Haavard Dalen<sup>4,5,6</sup> and Eivind Almaas<sup>1,2,\*</sup>

<sup>1</sup>Department of Biotechnology and Food Science, Norwegian University of Science and Technology, Trondheim, Norway

<sup>2</sup>K. G. Jebsen center for Genetic Epidemiology, Norwegian University of Science and Technology, Trondheim, Norway

<sup>3</sup>Department of Internal Medicine, University of Michigan, Ann Arbor, Michigan, USA

<sup>4</sup>Clinic of Cardiology, St. Olavs University Hospital, Trondheim, Norway

<sup>5</sup>Department of Circulation and Medical Imaging, Norwegian University of Science and Technology, Trondheim, Norway

<sup>6</sup>Department of Medicine, Levanger Hospital, Nord-Trøndelag Hospital Trust, Levanger, Norway

Correspondence\*:  
Corresponding Author  
[eivind.almaas@ntnu.no](mailto:eivind.almaas@ntnu.no)

## 2 ABSTRACT

3 Genetic research into Atrial Fibrillation (AF) and Myocardial Infarction (MI) has predominantly  
4 concentrated on contrasting afflicted individuals with their healthy counterparts. However, this  
5 approach lacks granularity, overlooking the subtleties within patient populations. In this study,  
6 we explore the distinction between AF and MI patients experiencing only single events to  
7 those experiencing recurrent events. Integrating hospital records, questionnaire data, clinical  
8 measurements, and genetic data from more than 500,000 HUNT and UKBB participants in our  
9 analysis, we compare the two groups for both clinical and genetic characteristics with GWAS  
10 meta-analyses, PheWAS-analyses, and gene co-expression networks. We find that the two  
11 groups of patients differs in both clinical characteristics and genetic risk. More specifically,  
12 recurrent AF patients are significantly younger with a better baseline health, in terms of lower  
13 cholesterol and blood pressure, than the single AF patients. The GWAS meta-analysis results  
14 indicate that recurrent AF patients seem to have a greater genetic risk of recurrent events and  
15 the PheWAS-analysis and gene co-expression network analyses highlight differences in the  
16 diseases and genetic functions associated to the set of SNPs and genes for to each group. In  
17 contrast, we find that for MI patients experiencing single events are significantly younger and  
18 have a better baseline health, yet they exhibit higher genetic risk. The GWAS meta-analysis

NOTE: This preprint reports new research that has not been certified by peer review and should not be used to guide clinical practice.

19 identifies mostly genetic regions uniquely associated with single MI, and the PheWAS-analysis  
20 and gene co-expression networks support the genetic differences between these two groups.

21 **Keywords:** GWAS meta-analysis, recurrent events, atrial fibrillation, myocardial infarction, networks, PheWAS, HUNT

## 1 INTRODUCTION

22 Myocardial infarction (MI) and atrial fibrillation (AF) are two major prevalent cardiovascular diseases. AF  
23 is an established risk factor for several other cardiovascular diseases, where the severity and mortality risk  
24 increase rapidly with relapse of AF. To treat and prevent new events of AF, medical and interventional  
25 therapy are available as treatments in order to normalize rhythm or to stabilize the heart rate. AF ablation  
26 has become the leading clinical treatment, but with varying success rate, where 20% to 40% of the patients  
27 require new treatment (1). Similarly, MI is a severe heart diagnosis associated with high mortality rates.  
28 Upon survival, the heart is most likely weakened, making the patient vulnerable for other diseases. In fact,  
29 33% of the patients experiencing MI die within a year (all death causes) (2). On the other hand, some  
30 patients experience only one event of MI and have a normal and healthy life afterwards. Most MI patients  
31 undergo cardiac catheterization and percutaneous coronary interventions in the acute phase, while medical  
32 therapy targeting clotting of blood and lipids as well as life-style interventions, are provided to reduce  
33 recurrent events. Still, a significant proportion of individuals suffers from relapse of MI.

34 Many genetic studies have been conducted to identify genetic variants that likely affect the risk of AF  
35 (3, 4) and MI (5, 6). While many variants have been identified and replicated in other studies, these variants  
36 were identified when comparing all included cases of AF or MI with healthy controls. Some studies have  
37 been conducted with the aim of understanding the genetic of patients experiencing recurrent events of  
38 AF (1, 7, 8, 9, 10) and MI (11, 12, 13). These are, however, mostly focused on either (A) response after  
39 treatment, or (B) the genetic effects on recurrence from known AF/MI variants or genes. Little effort  
40 has been made regarding the comparison of genetics between patients experiencing a single event versus  
41 patients experiencing recurrent events.

42 To our knowledge, no studies have been conducted with a full GWAS-analysis comparing recurrent  
43 to single events of AF and MI. In the presented study, we investigate if there are statistically significant  
44 genetic differences between patients experiencing recurrent events (defined as two or more events) of AF  
45 or MI compared to patients only experiencing a single event. Note that, we perform a general comparison  
46 without separating cases based on type of possible treatment after the first AF or MI event. By this, we  
47 perform a general comparison between single and recurrent events of AF and MI, to identify if there are  
48 any genetic differences between patients with single events to patients with recurrent events.

## 2 METHODS

### 2.1 Cohorts

#### 2.1.1 The HUNT study

51 The Trøndelag Health study (HUNT) is a health related population based longitudinal study, based on  
52 four rounds of data collection: HUNT1 (1984-1986), HUNT2 (1995-1997), HUNT3 (2006-2008) and  
53 HUNT4 (2017-2019). With a unique database covering clinical measurements, questionnaire data and  
54 biological samples from roughly 230,000 of Trøndelag counties' inhabitants from 1984 onward, it is one  
55 of the largest health studied ever performed (14). A great benefit of the HUNT study is the link with

56 other health related registries through the Norwegian unique personal identification number. Such health  
57 registries include hospital and general practitioner registries, cancer registries, cause of death registries,  
58 and the prescription database.

59 In the current study, genotype data for 69,621 participants from HUNT2 and HUNT3 were used, and  
60 these were linked to questionnaire data and clinical measurements from HUNT1, HUNT2, and HUNT3,  
61 regional hospital records, Nord-Trøndelag Hospital Trust (HNT), and the Norwegian Cause of Death  
62 registry (COD). The HNT register contains all ICD9 and ICD10-codes for registered hospital visits of these  
63 participants in the time period of August 1987 to April 2017. The COD registry spans the same time period,  
64 with registered ICD9 and ICD10-codes for the primary and secondary causes of death.

### 65 2.1.2 The United Kingdom Biobank

66 The United Kingdom Biobank (UKBB) is a health related population based study consisting of roughly  
67 500,000 middle aged UK inhabitants from across the country. Sampling of the participants took place  
68 during 2006-2010, where questionnaires, clinical measurements, and biological samples were collected.  
69 Similar to the HUNT study, it is also linked to electronic health records, containing information about  
70 the participants hospital, general practitioner, and death records with ICD9 and ICD10 diagnose codes  
71 (15). Genotyped data are available for more than 480,000 participants, and in the current study, we use  
72 these data together with relevant questionnaire data, clinical measurements, and hospital and death records  
73 for the genotyped participants (of European ancestry). The hospital records span the time period from  
74 December 1992 to September 2021. The death registry spans the same period, starting from 2006.

## 75 2.2 Genotyping and imputation

76 Genotyping and imputation for the HUNT and UKBB participants have been described elsewhere (16, 17).  
77 In short, genotyping was performed using one of three Illumina HumanCoreExome arrays: 12 v.1.0, 12 v.1.1  
78 with custom content (UM HUNT Biobank v1.0) according to standard protocols for the HUNT participants,  
79 and standard protocols for Affymetrix Applied Biosystems UK BiLEVE Axiom or Applied Biosystems UK  
80 Biobank Axiom array for the UKBB participants. Standard quality control was performed for the HUNT  
81 genotyping, as well as a UKBB-specific quality control for the UKBB genotyping. Imputation in HUNT  
82 was performed using 2,202 whole-genome sequenced samples from HUNT together with the Haplotype  
83 Reference Consortium (HRC) reference panel (18, 19), resulting in 25 million genetic markers. For UKBB,  
84 the HRC and UK10K+1000 Genomes reference panel was used, resulting in 90 million variants.

## 85 2.3 Definitions of traits and outcomes

86 Hospital records of HUNT and UKBB participants were used to determine cases of MI and AF, and  
87 the number of events for each participant. An event of MI is defined as having a registered diagnosis of  
88 ICD10:I21-I24 or ICD9:410. An event of AF is similarly defined with registered diagnosis of ICD10:I48 or  
89 ICD9:427.3.

90 In both records, each diagnosis is registered as a main or bi-diagnosis (denoted as first and second  
91 diagnosis in UKBB), and we consider them both when determining the number of events for each  
92 participant. Considering only the main diagnosis and filtering out bi-diagnosis can cause errors in addition  
93 to significantly reducing the amount of data. A bi-diagnosis can be interpreted in several ways: One could  
94 have the case where a person is admitted to the hospital with a main diagnosis, and additional diagnoses  
95 are detected and registered at this first visit. These will be registered as bi-diagnoses, even though they  
96 are new diagnoses and could have been recorded as main diagnoses if they were the only disease and the

97 reason for the hospital visit that day. A different example could be that the doctor could infer from  
98 previous records that other diseases (such as AF and MI) are relevant diagnoses for the main diagnosis and  
99 record these as bi-diagnoses, even though these are not new events. Due to the different ways of reporting  
100 bi-diagnosis, we apply some selective filtering in order to separate single events from recurring events of  
101 MI and AF.

102 A first event is defined as the first visit where this diagnosis is listed in the records, either as a main or a  
103 bi-diagnose. A second event is defined if there is more than one month time delay between the initial and  
104 the following events while one of the following two criteria are fulfilled: (i) the current event is a main  
105 diagnosis, (ii) the current event is a bi-diagnosis and the only diagnosis given that day (indicating that this  
106 is indeed a new event reported on this day). Following events are similarly registered as the second event,  
107 with a minimum one month time delay to the previously defined event. Except for the case of selecting the  
108 main diagnoses events exclusively, this is the only event definition that ensures the selection of new events.

109 As we are interested in contrasting patients with recurring events with relapse-free patients, we need to  
110 establish that the patients with only a single recorded event is not identified as such by the fact that they died  
111 before they experienced a new event. Identifying in the HUNT data that 80% of secondary events happened  
112 within a five year span for AF and seven year span for MI, we filter out single event participants who  
113 have died either due to the phenotype or within five or seven years after the AF or MI event, respectively  
114 (corresponding values were found in UKBB). Also, we take notice of the censoring dates of *06-04-2017*  
115 and *12-11-2021* for HUNT and UKBB respectively, and filter out participants registered with only one  
116 event of AF or MI, where their last AF or MI event is less than five and seven years prior to these censoring  
117 dates.

118 The four trait groups are from here denoted as single AF/MI: participants that experience only one  
119 event of AF/MI, and recurrent AF/MI: participants that experience more than one event of AF/MI, while  
120 satisfying the conditions specified above.

121 Baseline and clinical characteristics, as well as information about other relevant diseases identified  
122 with the participants, were taken from HUNT and UKBB hospital records, questionnaires, and clinical  
123 measurements. Participants were defined to have diabetes and/or hypertension if they have ever been  
124 registered with the ICD-codes ICD10:E10-E14 or ICD9:250 for diabetes and/or ICD10:I10-I15 (excluding  
125 I11.0), ICD9:401-405 for hypertension. The smoking variable is based on the HUNT question: "Have you  
126 ever smoked? (Yes/No)", where the latest possible HUNT participation were used for each patient. The  
127 corresponding variable in UKBB reads "Ever smoked (Yes/No)" which was constructed upon sampling.  
128 BMI, cholesterol, systolic and diastolic blood pressure were measured in HUNT2 and HUNT3, where the  
129 HUNT study closest prior to the disease event were used. Corresponding variables were measured upon  
130 sampling in the UKBB. Student's t-test for continuous variables and Fishers' exact test for binary variables  
131 were used to test differences of the characteristics (age, diabetes, hypertension, BMI, smoking, cholesterol,  
132 systolic, and diastolic blood pressure) between groups of single versus recurrent events. Test statistics with  
133 Bonferroni-adjusted  $p$ -values ( $p < 0.05/8 = 6.25 \cdot 10^{-3}$ ) were considered as significant findings.

## 134 **2.4 GWAS meta-analysis**

135 To identify genetic factors associated with single or recurrent events of AF and MI, we conducted three  
136 GWAS analyses for each trait in both cohorts separately: (i) patients with single events versus healthy  
137 controls, (ii) patients with recurrent events versus healthy controls, and (iii) patients with recurrent events  
138 versus patients with single events. As a control, we also conducted a GWAS analysis in each cohort  
139 with all cases of each disease against healthy controls. Healthy controls were defined as participants with

140 no registered events of AF and MI, respectively. Variants with minor allele count (MAC) < 3 and an  
141 imputation score < 0.3 were excluded from all GWAS results. Participants with non-European recent  
142 ancestry were excluded from the analyses in UKBB (all genotyped HUNT participants are of European  
143 ancestry). Association analyses were performed with SAIGE, using a generalized linear mixed model  
144 adjusting for relatedness and unbalanced case-control ratios (20). Birth year, gender, batch/chip, and the  
145 first four principal components were added as covariates in the models. Genomic variants with minor allele  
146 frequency (MAF) > 1% in one or both studies were included in the meta-analysis.

147 From the eight GWAS analyses (three for AF and three for MI, and one control for each disease)  
148 performed for both the HUNT population and the UKBB population, we performed eight fixed-effect  
149 inverse variance weighted (IVW) meta-analyses using METAL (21). In METAL, each variant is assigned a  
150 new effect size as a sum of each study's effect size weighted by the corresponding study variance. The  
151  $p$ -values in the meta-analysis are calculated based on the  $Z$  statistic given by the new effect sizes and  
152 standard errors. Variants reaching genome-wide significance ( $p$ -values <  $5 \cdot 10^{-8}$ ) from the  $Z$  statistic  
153 were considered as significant findings. Annotations of the significant SNPs, identification of nearest genes,  
154 and search for nearby SNPs associated with relevant traits were performed with the FUMA platform and  
155 the GWAS catalog (22, 23). Variants were considered to be in the same genetic region if they were less than  
156 500 kb apart, and genetic regions denoted as shared for both the single and recurrent events meta-analysis  
157 were either consisting of the same SNPs or SNPs within the same genetic region.

## 158 2.5 Phenome Wide Association Studies (PheWAS)

159 Phenome Wide Association Studies (PheWAS) were performed on all SNPs from the meta-analyses  
160 reaching genome-wide significance. From the comprehensive Pan UKBB resource (24), we collected  
161 results from GWAS conducted on 1,326 phenocodes, and we identified the effect of each of our SNPs  
162 of interest on each phenocode. All GWAS results from the Pan UKBB are based on UKBB participants,  
163 and we selected results for European ancestry exclusively. For each set of SNPs (identified in common or  
164 specifically for either single or recurrent AF/MI), phenotypes with a  $p$ -value less than  $0.05/(1326 \times n_{set})$ ,  
165 where  $n_{set}$  is the number of SNPs in the set, were considered as significant associations. For simplicity,  
166 only the SNP with the lowest  $p$ -value for each phenotype were selected among each set of SNPs.

## 167 2.6 Gene function and network analyses

168 The sets of nearest genes to the SNPs identified through the GWAS analyses as common or unique to  
169 either recurrent or single AF/MI events (in total six sets) were analyzed for tissue specificity (differentially  
170 expressed gene sets in each tissue). We employed both FUMA(22) and gene ontology enrichment using the  
171 Fishers Exact over-representation test in PANTHER (protein annotation through evolutionary relationship)  
172 (25). Here, biological processes with false discovery rate (FDR) adjusted for multiple testing < 0.05 were  
173 considered as functionally enriched for the gene set. To further investigate processes connected to these  
174 genes, we performed gene co-expression network analysis (26, 27, 28), where the hypothesis is that highly  
175 correlated genes have a regulatory relationship or similar response in a condition (29). Using the identified  
176 gene sets as target genes in an egocentric gene co-expression network analysis, we generate a network  
177 from the shared neighborhoods among the closest neighbour-genes of each target gene (in the gene) set  
178 and inspect the gene functions in the network.

179 Creating these egocentric networks involves several steps. First, using gene expression data from  
180 GTEx v.8(30) (<https://www.gtexportal.org>) gene co-expression networks for seven tissue sub-types from  
181 heart, muscle skeletal, artery, and kidney (GTEx\_Analysis\_v8\_eQTL\_expression\_matrices.tar: *Heart Atrial*

182 *Appendage, Heart Left Ventricle, Muscle Skeletal, Artery Aorta, Artery Coronary, Artery Tibial* and  
183 *Kidney Cortex*) were created. Since co-expression patterns may vary in different tissues (29), a separate  
184 network was created for each tissue. Following the WGCNA-approach (31), the link weight (strength of  
185 co-expression) between each pair of genes ( $i$  and  $j$ ) were defined by the weighted topological overlap  
186 ( $wTO$ ):

$$wTO_{ij} = \frac{A_{ij} + \sum_{k \neq i,j} A_{ik}A_{kj}}{\min(\sum_u A_{iu}, \sum_u A_{ju}) + 1 - A_{ij}}, \quad (1)$$

187 where  $A_{ij} = |cor(i, j)|^6$  is the absolute Pearson correlation of the gene expressions raised to a power 6  
188 to emphasize the strongest correlations. The resulting gene co-expression network is then an all-to-all  
189 network where pairs of genes with high  $wTO$ -link weights represent strong connections between the genes  
190 and their topological neighbourhood. Only the 15% strongest links from each tissue were included in the  
191 following analysis (still leaving about 30 million links), to avoid inclusion of genes based on weak (and  
192 likely spurious) connections.

193 Next, for each of the seven tissues, egocentric networks for each target gene were extracted from the  
194 co-expression networks. The egocentric networks were filtered to include only the 25 genes with the  
195 strongest  $wTO$ -link weights with each target gene. By merging and further reducing the complexity of  
196 the networks, the 25 strongest linked genes to each target gene across all tissues were selected in the final  
197 network. Here, we weighted the link strengths using  $wTO_{ij}^{weighted} = \sqrt{\sum_{w=1}^W wTO_{ij,w}^2}$ , where  $W$  is the  
198 number of tissues in which the linked gene is among the 25 strongest linked gene to the target gene, and  
199  $wTO_{ij,w}$ , is the corresponding  $wTO$ -link weight in tissue  $w$ .

200 The final six sets of egocentric networks for target genes identified as common or as unique for the single  
201 or recurrent AF/MI events, were analyzed with the *igraph* R-package (32, 33). Shared neighbouring genes  
202 were defined as genes linked to two or more of the target genes. The set of shared neighbourhood genes for  
203 each network was plotted separately with Cytoscape (v. 3.8.1) (34) and gene ontology enrichment of these  
204 gene sets were obtained through the PANTHER over-representation test (25).

## 3 RESULTS

### 205 3.1 Characteristics of trait groups

206 Among the genotyped participants with European ancestry included in this study, there are 7, 127 and  
207 29, 330 hospital patients registered with AF in HUNT and UKBB, respectively. With the filtering described  
208 in the methods section, we identify 1, 425 HUNT and 9, 561 UKBB patients with single AF events, and  
209 2, 267 HUNT and 7, 267 UKBB patients with recurrent AF events. Correspondingly, 5, 805 HUNT and  
210 14, 592 UKBB participants are registered with MI events, and 1, 651 HUNT and 6, 584 UKBB patients are  
211 identified with single MI events, and 1, 615 HUNT and 1, 615 UKBB patients are identified with recurrent  
212 MI events.

213 Baseline and clinical characteristics of these patients are presented in Tab. 1. Comparing the two AF  
214 groups in HUNT, there seems to be a tendency that the group experiencing single AF events are older with  
215 worse health conditions, having a higher percentage of diabetes and hypertension and being significantly  
216 older (adjusted  $p$ -value  $2 \cdot 10^{-10}$ ) with significantly higher levels of cholesterol and systolic blood pressure  
217 (adjusted  $p$ -values  $6.1 \cdot 10^{-6}$  and  $5 \cdot 10^{-4}$ ). Comparing the AF groups in UKBB, we see the same tendency  
218 with significantly higher age (adjusted  $p$ -value  $< 10^{-16}$ ) and somewhat higher levels of BMI and systolic  
219 blood pressure for the single AF event group compared to the recurrent AF group. Comparing the MI groups

|                  | AF HUNT                    |                               | AF UKBB                    |                               |
|------------------|----------------------------|-------------------------------|----------------------------|-------------------------------|
|                  | Single<br><i>n</i> = 1,435 | Recurrent<br><i>n</i> = 2,267 | Single<br><i>n</i> = 9,561 | Recurrent<br><i>n</i> = 7,267 |
| Male (%)         | 58                         | 62                            | 65                         | 66                            |
| Birth year       | 1933(12)                   | 1936(12)                      | 1946(6)                    | 1947(6)                       |
| Age first event  | 71(12)*                    | 68(12)                        | 65(7)*                     | 64(8)                         |
| Diabetes (%)     | 21                         | 18                            | 19                         | 19                            |
| Hypertension (%) | 59                         | 57                            | 67                         | 70*                           |
| BMI              | 28.2(4.4)                  | 28.3(4.6)                     | 29.0(5.3)                  | 28.9(5.2)                     |
| Smoking (%)      | 62                         | 64                            | 66                         | 66                            |
| Cholesterol      | 5.73(1.33)*                | 5.72(1.21)                    | 5.6(1.2)                   | 5.6(1.2)                      |
| Systolic BP      | 144(24)*                   | 141(22)                       | 142(19)                    | 141(19)                       |
| Diastolic BP     | 79.4(14.2)                 | 79.0(13.3)                    | 82.6(10.8)                 | 82.5(10.7)                    |

  

|                  | MI HUNT                          |                                      | MI UKBB                          |                                      |
|------------------|----------------------------------|--------------------------------------|----------------------------------|--------------------------------------|
|                  | Single event<br><i>n</i> = 1,651 | Recurrent events<br><i>n</i> = 1,615 | Single event<br><i>n</i> = 6,584 | Recurrent events<br><i>n</i> = 1,615 |
| Male (%)         | 70.7                             | 67.2                                 | 78                               | 78                                   |
| Birth year       | 1935(12)                         | 1934(13)                             | 1947(6)                          | 1947(6)                              |
| Age first event  | 64(11)                           | 68(12)*                              | 59(8)                            | 61(9)*                               |
| Diabetes (%)     | 19                               | 25*                                  | 21                               | 35*                                  |
| Hypertension (%) | 52                               | 58*                                  | 74                               | 88*                                  |
| BMI              | 27.7(4.0)                        | 28.0(4.1)                            | 28.8(4.5)                        | 29.3(5.0)*                           |
| Smoking (%)      | 76*                              | 71                                   | 72                               | 74                                   |
| Cholesterol      | 5.67(1.45)                       | 5.92(1.44)*                          | 5.50(1.27)                       | 5.45(1.28)                           |
| Systolic BP      | 140(22)                          | 144(23)*                             | 140(20)                          | 141(20)                              |
| Diastolic BP     | 78.7(12.9)                       | 80.0(13.4)                           | 81.1(11.0)                       | 80.5(11.0)                           |

**Table 1.** Characteristics of sample groups of single and recurrent events of AF and MI in the HUNT and UKBB population. Continuous variables are presented as mean and (sd), and dichotomous variables are reported in percentages. Starred values indicate a significant difference between the single and recurrent group, where the starred value is marking the larger value.

220 in HUNT, we see the reverse trends, where patients experiencing recurrent MI events are significantly older  
 221 (adjusted  $p$ -value  $< 10^{-16}$ ) with significantly higher percentages of diabetes and hypertension (adjusted  
 222  $p$ -values  $8.8 \cdot 10^{-5}$  and  $7.6 \cdot 10^{-3}$ ) and significantly higher levels of cholesterol and systolic blood pressure  
 223 (adjusted  $p$ -values  $5.4 \cdot 10^{-6}$  and  $1.4 \cdot 10^{-5}$ ). There is also a tendency of higher BMI and diastolic blood  
 224 pressure for this group. The same trends are found in the UKBB MI groups, with significantly higher  
 225 age, BMI and percentage of diabetes and hypertension (adjusted  $p$ -values  $6 \cdot 10^{-14}$ ,  $3.9 \cdot 10^{-5}$ ,  $< 10^{-16}$   
 226 and  $< 10^{-16}$ ) for the recurrent MI events group compared to the single MI events group. There is also a  
 227 tendency towards higher levels of systolic blood pressure for the UKBB single MI events group.

228 In total, these are indications of patients experiencing only single AF events being older at their first event  
 229 and with worse health condition and lifestyle factors compared to the recurrent AF cases. We therefore  
 230 hypothesise that single AF events could be more likely driven by age and other lifestyle factors, while there  
 231 are genetic factors driving recurrent AF events. For MI, the characteristics point in the opposite direction,  
 232 where patients experiencing recurrent MI events are older and generally of worse health conditions and  
 233 lifestyle factors compared to patients with only one MI event and surviving it. For MI, we therefore  
 234 formulate two hypothesis: (i) that recurrent MI events are driven by the age at first event and worse health  
 235 conditions, while single MI events are driven by genetic factors, or (ii) that both single and recurrent MI

236 are driven by the same genetic factors, but recurring MI are due to higher age and other lifestyle factors  
237 affecting the risk of obtaining new MI events.

## 238 3.2 Genetic differences

239 In the following, we explore our hypothesis (defined above) for AF and MI by investigating genetic  
240 differences between the groups identified through the GWAS meta-analyses.

### 241 3.2.1 Genetic differences in AF

242 To test our hypothesis that patients experiencing recurrent AF events are more genetically susceptible  
243 than patients experiencing single AF, we perform three GWAS-meta analyses (see Methods). The GWAS  
244 meta-analysis comparing single to recurrent AF events found no regions with significantly different effects.  
245 Some SNPs were identified genome-wide significant in the HUNT population, but these were rare variants  
246 ( $MAF \leq 0.2\%$ ) and removed through filtering prior to the META-analysis. Comparing the GWAS meta-  
247 analyses of each group against healthy controls (Tab. 2 and Fig. 1), we find that 18 regions are specifically  
248 associated with recurrent AF events, 2 are specifically associated with single AF events and 16 are identified  
249 in both GWAS investigations. Many regions comprise multiple SNPs that exhibit significant effects in only  
250 one of the study groups. Five regions identified in the recurrent AF GWAS study consist of only one SNP,  
251 yet these are identified with similarly strong effects in both the HUNT and the UKBB studies, indicating a  
252 genuine association. Regional plots of the single SNP hits uniquely associated with recurrent AF are shown  
253 in Additional File 1, Fig.S15-S19. The presented results show that over half of the identified regions are  
254 specifically linked to single or recurrent AF, supporting the hypothesis that patients who have experienced  
255 recurrent AF events are genetically more susceptible than those who have only experienced one event and  
256 survived it.

257 All regions had previously been associated with AF, and all regions except one (the region at chromosome  
258 7 in the KCNH2 gene) were identified in the full AF GWAS meta-analysis by comparing all AF cases  
259 against healthy controls. This indicates that all the regions identified as unique for single or recurrent AF  
260 (excluding the KCNH2 gene region) have an effect when compared to healthy controls, with the true effect  
261 being mainly or solely for patients experiencing single or recurrent AF. The five SNPs in the KCNH2 gene,  
262 however, are not detected in our full GWAS meta-analysis and therefore only show an effect for patients  
263 experiencing recurrent AF.

264 To our knowledge, only seven genes have been found to be associated with AF recurrence: SOX5, CAV1,  
265 EPHX2, ITGA9, SLC8A1, TBX5 and PITX2 (10, 8, 35, 1). Our findings show that regions proximate  
266 to the SOX5, CAV1, TBX5 and PITX2 genes are identified in both the single and the recurrent GWAS,  
267 yielding comparable effects. Thus, no differences in the impact of these regions between the two groups  
268 are evident. No regions were identified near the EPHX2, SCL8A1 and ITGA9 genes. Variants near the  
269 NAV2 and SCN10A genes have previously been tested for their effect in recurrent AF events without any  
270 significant findings (36, 35). In this study, we discovered 26 and 16 SNPs located within and nearby the  
271 NAV2 and SCN10A genes, respectively, that are exclusively associated with recurrent AF, suggesting that  
272 these SNPs have a distinct effect on recurrent AF patients compared to single AF cases.

273 Several of the genes listed in Tab.2 code for functions related to AF. Two of the genes listed as "Common"  
274 (KCNN3 and HCN4) and three genes identified uniquely for recurrent AF (SCN10A, KCNH2 and KCNJ5)  
275 are related to electrophysiological activity, coding for potassium and sodium channels. Other genes listed as  
276 "Common" in Tab. 2 code for functions directly linked to heart activity and AF (TTN, TBX5, SYNE2 and  
277 RPL3L) or indirectly linked through comorbidities (ATXN1, CAV1, SH3PXD2A and ZFH3). Two of the



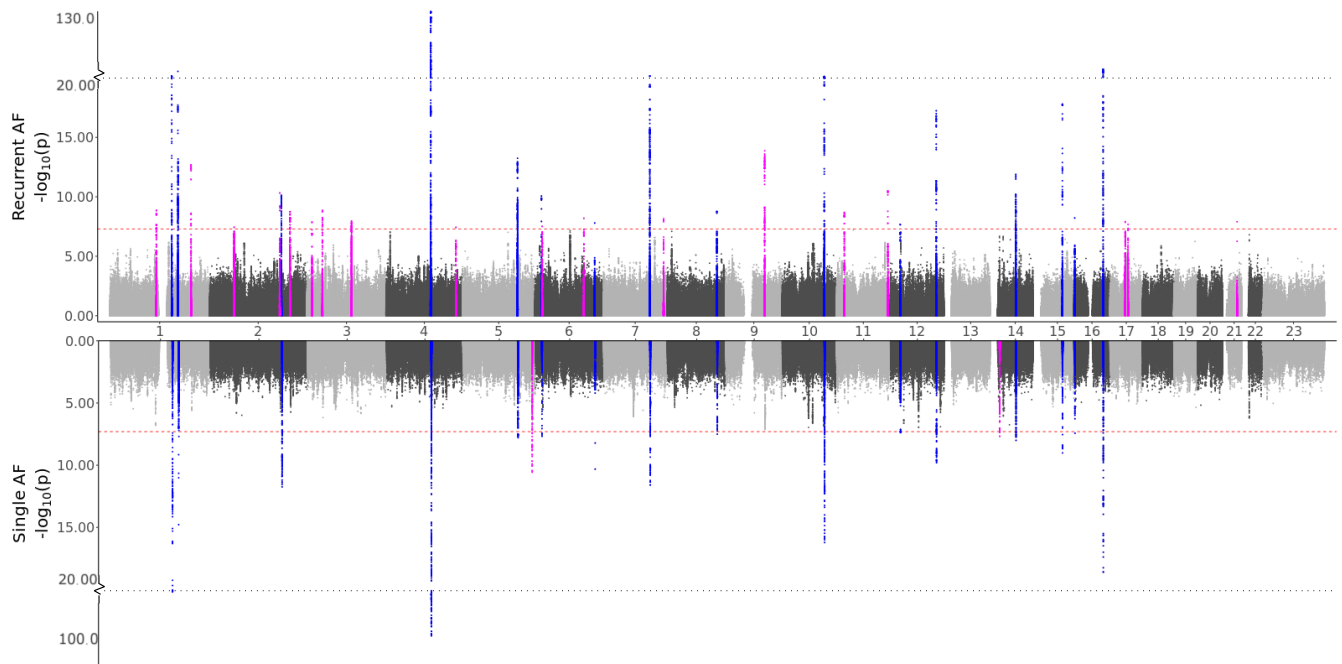

**Figure 1.** GWAS meta analysis results for Atrial Fibrillation (AF). Top: Comparing recurrent AF patients to AF-free controls. Bottom: Comparing single AF patients to AF-free controls. Blue colored spikes represent regions of SNPs found to be statistically significant in both GWAS studies (common), while magenta spikes represent statistically significant regions of SNPs specifically associated with the given AF group.

278 recurrent AF genes also code for functions directly or indirectly linked to AF (CASQ2 and GOSR2), and  
279 some indicate a possible indirect link related to comorbidities, e.g. hypertension or malignancy (PPFIA4,  
280 USP34, WIPF1, SPATS2L, CAND2 and AOPEP). The two genes uniquely identified for single AF have  
281 been shown important for myocardial diseases and cardiac abnormalities, coding for functions found  
282 central in malformation in heart (NKX2-5) and myosin (MYH7).

### 283 3.2.2 Genetic differences in MI

284 Based on the characteristics of the two MI groups, we formulate two hypotheses: (i) Single MI events  
285 may be driven by genetic factors and may be more susceptible to medical treatment, while recurrent MI  
286 events may be driven by higher age at the first event and other lifestyle factors, and (ii) Both single and  
287 recurrent MI are driven by the same genetic factors, but recurring MI events occur due to higher age and  
288 lifestyle factors. Testing for direct genetic differences between the two MI groups, the GWAS meta-analysis  
289 (comparing single to recurrent events) did not detect any regions with significant effects. When testing for  
290 genetic effects in each groups when compared to MI-free controls, the GWAS meta-analyses shown in  
291 Fig. 2 and Tab. 3 identified four regions that are in common for both groups, 24 regions that are specifically  
292 identified for the single event groups, and two regions that are unique for the recurrent events group. Hence,  
293 some genetic factors are common for both groups, but most identified genetic effects are unique to patients  
294 experiencing only one event of MI and surviving it. This results is in support of our first hypothesis.

295 Some distinct regions, including the SNPs in the NBEAL1 and ATXN2 genes for single MI events, and  
296 SNPs in the MIA3 gene for recurrent events, exhibit substantial effects for multiple SNPs in the region,  
297 with comparable effects in both the HUNT and UKBB populations. Several regions represent suggestive  
298 findings comprising only single SNPs and are only identified in the HUNT population (regional plots

Hall et al.

| AFull | AF Study  | Known | rsID         | Chr:pos_Ref/Alt  | Gene     | Function   | Effect | StdErr | Pvalue                 | Dir | Nsnps |
|-------|-----------|-------|--------------|------------------|----------|------------|--------|--------|------------------------|-----|-------|
| Yes   | Common    | Yes   | rs6691463    | 1:154814538_C/G  | KCNN3    | intronic   | -0.16  | 0.015  | $3.5 \times 10^{-24}$  | --  | 166   |
| Yes   | Common    | Yes   | rs72700114   | 1:170193825_G/C  | NTMT2    | intergenic | 0.36   | 0.031  | $9.1 \times 10^{-32}$  | ++  | 239   |
| Yes   | Common    | Yes   | rs1429094    | 2:179515774_A/G  | TTN      | intergenic | -0.14  | 0.02   | $1.8 \times 10^{-12}$  | --  | 64    |
| Yes   | Common    | Yes   | rs6843082    | 4:111718067_G/A  | PITX2    | intergenic | -0.5   | 0.021  | $2.4 \times 10^{-132}$ | --  | 553   |
| Yes   | Common    | Yes   | rs678897     | 5:137441065_G/C  | NME5     | intergenic | 0.13   | 0.017  | $5.7 \times 10^{-14}$  | ++  | 229   |
| Yes   | Common    | Yes   | rs112899072  | 6:16417852_C/G   | ATXN1    | intronic   | 0.15   | 0.023  | $8.6 \times 10^{-11}$  | ++  | 10    |
| Yes   | Common    | Yes   | rs117984853  | 6:149399100_G/T  | UST      | downstream | 0.16   | 0.025  | $4.9 \times 10^{-11}$  | ++  | 2     |
| Yes   | Common    | Yes   | rs11773845   | 7:116191301_C/A  | CAV1     | intergenic | 0.16   | 0.016  | $4 \times 10^{-24}$    | ++  | 218   |
| Yes   | Common    | Yes   | rs17337621   | 8:124542519_G/C  | FBXO32   | intronic   | 0.19   | 0.032  | $1.7 \times 10^{-9}$   | ++  | 5     |
| Yes   | Common    | Yes   | rs1389189    | 10:105486077_A/G | SH3PXD2A | intronic   | -0.14  | 0.017  | $6.1 \times 10^{-17}$  | --  | 122   |
| Yes   | Common    | Yes   | rs137913153  | 12:24776752_A/G  | SOX5     | intergenic | 0.11   | 0.02   | $4.2 \times 10^{-8}$   | ++  | 8     |
| Yes   | Common    | Yes   | rs883079     | 12:114793240_C/T | TBX5     | UTR3       | 0.15   | 0.017  | $5.8 \times 10^{-18}$  | ++  | 67    |
| Yes   | Common    | Yes   | rs1152591    | 14:64680848_A/G  | SYNE2    | intronic   | 0.11   | 0.015  | $1.3 \times 10^{-12}$  | ++  | 67    |
| Yes   | Common    | Yes   | rs7172038    | 15:73667255_T/G  | HCN4     | intergenic | -0.18  | 0.021  | $1.6 \times 10^{-18}$  | --  | 44    |
| Yes   | Common    | Yes   | rs140185678  | 16:2003016_G/A   | RPL3L    | exonic     | 0.25   | 0.043  | $6.1 \times 10^{-9}$   | ++  | 1     |
| Yes   | Common    | Yes   | rs4499262    | 16:73059159_C/A  | ZFH3     | intronic   | 0.26   | 0.021  | $2.5 \times 10^{-35}$  | ++  | 108   |
| Yes   | Recurrent | Yes   | rs9428227    | 1:116309200_C/T  | CASQ2    | intronic   | 0.093  | 0.015  | $1.3 \times 10^{-9}$   | ++  | 24    |
| Yes   | Recurrent | Yes   | rs2270543    | 1:203030685_T/C  | PPFIA4   | intronic   | 0.11   | 0.015  | $2 \times 10^{-13}$    | ++  | 26    |
| Yes   | Recurrent | Yes   | rs12463885   | 2:61457996_A/C   | USP4     | intronic   | 0.086  | 0.016  | $3.6 \times 10^{-8}$   | ++  | 1     |
| Yes   | Recurrent | Yes   | rs56181519   | 2:175555714_C/T  | WIPF1    | intergenic | -0.12  | 0.018  | $4.8 \times 10^{-11}$  | --  | 4     |
| Yes   | Recurrent | Yes   | rs7605146    | 2:201183888_G/A  | SPATS2L  | intronic   | 0.094  | 0.016  | $1.8 \times 10^{-9}$   | ++  | 40    |
| Yes   | Recurrent | Yes   | rs4642101    | 3:12842223_T/G   | CAND2    | intronic   | -0.091 | 0.016  | $1.3 \times 10^{-8}$   | --  | 2     |
| Yes   | Recurrent | Yes   | rs6790396    | 3:38771925_C/G   | SCN10A   | intronic   | -0.095 | 0.016  | $1.4 \times 10^{-9}$   | --  | 16    |
| Yes   | Recurrent | Yes   | rs73228569   | 3:111614052_T/C  | PHLDB2   | intronic   | 0.12   | 0.021  | $1.5 \times 10^{-8}$   | ++  | 34    |
| Yes   | Recurrent | Yes   | rs12646050   | 4:174634261_A/G  | RANP6    | intergenic | 0.14   | 0.026  | $3.7 \times 10^{-8}$   | ++  | 1     |
| Yes   | Recurrent | Yes   | rs34969716   | 6:18210109_G/A   | KDM1B    | intronic   | 0.095  | 0.017  | $3.1 \times 10^{-8}$   | ++  | 1     |
| Yes   | Recurrent | Yes   | rs2684249    | 6:122392511_T/C  | HSF2     | intergenic | 0.09   | 0.016  | $6.4 \times 10^{-9}$   | ++  | 1     |
| No    | Recurrent | Yes   | rs758890     | 7:150655643_G/A  | KCNH2    | intronic   | -0.094 | 0.016  | $7 \times 10^{-9}$     | --  | 5     |
| Yes   | Recurrent | Yes   | rs10993463   | 9:97807233_C/T   | AOPEP    | intronic   | 0.12   | 0.016  | $1.3 \times 10^{-14}$  | ++  | 88    |
| Yes   | Recurrent | Yes   | rs2568119    | 11:20004957_G/A  | NAV2     | intronic   | 0.11   | 0.018  | $2 \times 10^{-9}$     | ++  | 26    |
| Yes   | Recurrent | Yes   | rs3765618    | 11:128769876_C/G | KCNJ5    | UTR3       | -0.18  | 0.027  | $3.2 \times 10^{-11}$  | --  | 12    |
| Yes   | Recurrent | Yes   | rs12944882   | 17:37983492_T/C  | IKZF3    | intronic   | 0.088  | 0.015  | $1.2 \times 10^{-8}$   | ++  | 2     |
| Yes   | Recurrent | Yes   | rs17608766   | 17:45013271_T/C  | GOSR2    | UTR3       | -0.12  | 0.022  | $2.1 \times 10^{-8}$   | --  | 2     |
| Yes   | Recurrent | Yes   | rs2834618    | 21:36119111_T/G  | CLIC6    | intergenic | 0.15   | 0.026  | $1.2 \times 10^{-8}$   | ++  | 1     |
| Yes   | Single    | Yes   | rs1223535129 | 5:172664353_CG/C | NKX2-5   | intergenic | 0.11   | 0.017  | $2.7 \times 10^{-11}$  | ?+  | 31    |
| Yes   | Single    | Yes   | rs28631169   | 14:23888183_C/T  | MYH7     | intronic   | 0.1    | 0.018  | $2.1 \times 10^{-8}$   | ++  | 2     |

**Table 2.** Atrial Fibrillation (AF) variants found to be significant in the GWAS meta analysis. The lead variant (lowest *p*-value) for each independent region is listed. The "AFfull" column describes if the variant (or any of the significant variants in this region) is also identified in the full AF GWAS meta analysis. The "AF Study" column shows in which of the studies the variant/region was found to be significant ("common" meaning significant in both the single and the recurrent GWAS meta analysis). The "Known" column reports if this region is previously known for AF. The subsequent columns are "rsID," position, nearest gene, and the function of the lead SNP as well as effect size, standard error, and *p*-value from the meta-analysis. "Dir" corresponds to the direction of the effect in the HUNT and UKBB GWAS meta-analysis respectively (an entry of ? meaning not included in the meta-analysis - see Additional File 4 for allele frequencies), and "Nsnps" shows the number of significant SNPs in the region.

299 of the single SNP hits uniquely associated with single or recurrent MI are shown in Additional File 1,  
 300 Fig.S20-S39). However, as shown in Additional File 4, these variants are not HUNT-specific since they are  
 301 reported with relative high frequencies in the general European population. Hence, although they are rare in  
 302 the UKBB population and thereby not included in the META-analysis, including a different European study  
 303 population could validate or dispute the effect identified here. Also, many of these regions are well-known  
 304 for MI, further indicating that these findings might be valid.

305 Comparing the GWAS meta-analysis of all MI cases to MI-free controls, we find that all four regions that  
 306 were identified in common for single and recurrent MI (regions in or close to the genes HPCAL1, LPA,  
 307 CDKN2A and CXADR) were also found in the full MI GWAS meta-analysis. The two regions that were  
 308 specifically associated with recurrent MI events (regions close to the MIA3 and NOVA1 genes) were also  
 309 identified in the full MI GWAS, but nine of the regions specifically associated with single MI were not

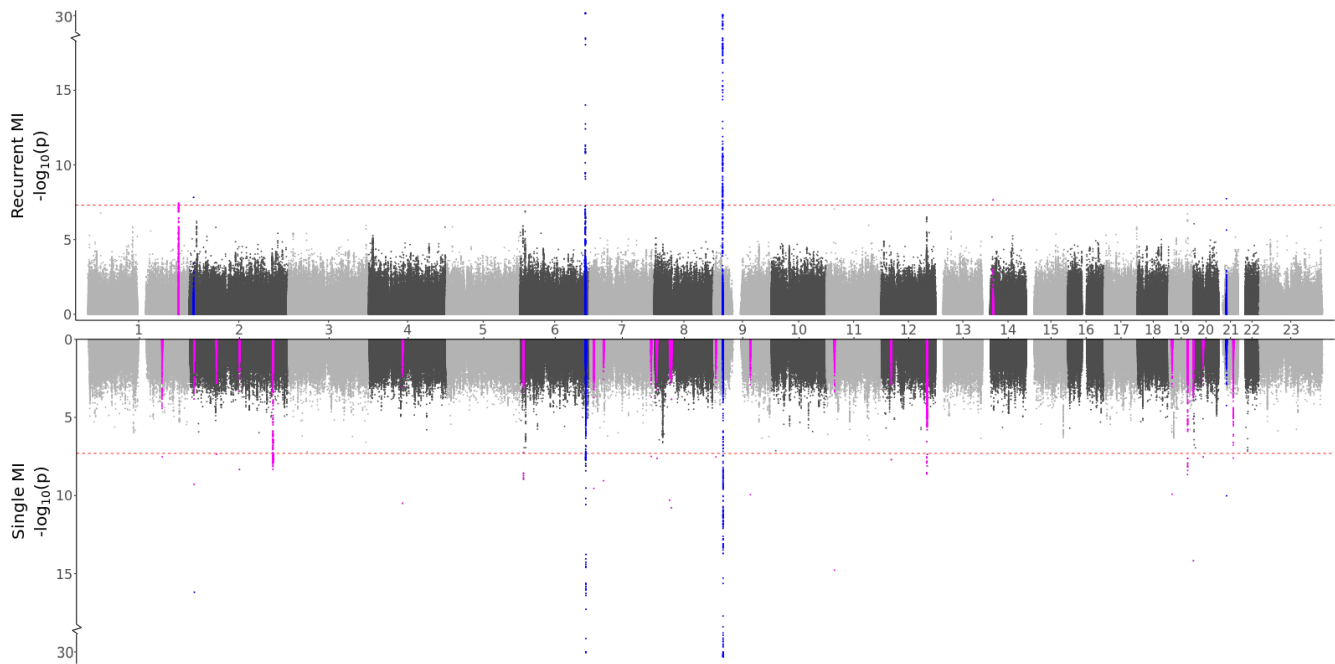

**Figure 2.** GWAS meta-analysis results for Myocardial Infarction (MI). Top: Comparing recurrent MI patients to MI-free controls. Bottom: Comparing single MI patients to MI-free controls. Blue colored spikes represent regions of SNPs found to be statistically significant in both GWAS studies (common), while magenta spikes represents statistically significant regions of SNPs that are specifically associated with the given MI group.

310 detected in the full MI GWAS (regions in or close to the OVAAL, TAF1B, GLI2, BBS9, MCPH1, GLIS3,  
311 HECTD4, INSR and SYNDIG1). Hence, certain regions identified in the full MI GWAS are exclusively  
312 linked to either single or recurrent MI, and some regions are only observed when patients with single MI  
313 events are filtered out, emphasizing the need for dividing the MI groups.

314 Ten of the 24 regions specifically associated with single MI (the regions in or close to OVAAL, BMP3,  
315 RIOK1, AC096553.5, MCPH1, KCNU1, GLIS3, TUT7, TRIB3 and SYNDIG1) are novel findings for  
316 MI, and thus, have not previously been associated with CVD-related traits. While these regions consist  
317 of only a single SNP (with the exception of the five SNPs close to the RIOK1 gene) and are only found  
318 in the HUNT population (except for the SNP close to the KCNU1 gene), some of them are coding for  
319 similar functions to the identified previously known MI genes. Three of these genes are commonly related  
320 to malignancy (OVAAL, RIOK1, TUT7), similar to NBEAL1, in which we identify a known MI region  
321 consisting of 254 SNPs uniquely associated with single MI. Other genes are coding for proteins involved in  
322 calcium handling (BMP3, SYNDIG1) or associated with diabetes mellitus (GLIS3, TRIB3), which points  
323 toward a more aggressive development of atherosclerosis. Similarly, both ATXN2 and HECTD4, for which  
324 we identify known MI regions uniquely associated with single MI, are associated with diabetes mellitus.  
325 The two regions exclusively linked to recurrent MI events are both found with negative effects in both  
326 the HUNT and the UKBB population. The region close to the MIA3 gene has been associated with MI  
327 previously, while the single SNP close to the NOVA1 gene (also with possible relations to malignancy) is a  
328 novel finding. Taken together, these results highlight some interesting genes with a possible relation to MI.  
329 Further studies are needed to investigate if similar effects are found in other European and non-European  
330 populations and if these SNPs/genes link to MI and specifically link to either single or recurrent MI events.

Hall et al.

| Mifull | MI Study  | Known | rsID         | lead              | Gene       | Function   | Effect | StdErr | Pvalue                | Dir | Nsnps |
|--------|-----------|-------|--------------|-------------------|------------|------------|--------|--------|-----------------------|-----|-------|
| Yes    | Common    | No*   | rs7600627    | 2:10543580_T/G    | HPCAL1     | intronic   | 0.41   | 0.049  | $6.5 \times 10^{-17}$ | +   | 1     |
| Yes    | Common    | Yes   | rs55730499   | 6:161005610_C/T   | LPA        | intronic   | 0.3    | 0.031  | $1.4 \times 10^{-21}$ | ++  | 59    |
| Yes    | Common    | Yes   | rs1333049    | 9:22125503_G/C    | CDKN2A     | intergenic | 0.18   | 0.016  | $3.8 \times 10^{-27}$ | ++  | 184   |
| Yes    | Common    | No    | rs2846882    | 21:18930412_T/A   | CXADR      | intronic   | -0.29  | 0.044  | $9.6 \times 10^{-11}$ | -?  | 1     |
| No     | Single    | No    | rs72720974   | 1:180559567_A/G   | OVAAL      | intergenic | 0.23   | 0.042  | $3 \times 10^{-8}$    | +   | 1     |
| No     | Single    | No*   | rs1620983    | 2:10028920_T/G    | TAF1B      | intronic   | 0.27   | 0.043  | $5.3 \times 10^{-10}$ | +   | 1     |
| Yes    | Single    | No*   | rs2422293    | 2:65033227_A/G    | SERTAD2    | intergenic | 0.26   | 0.047  | $4.4 \times 10^{-8}$  | +   | 1     |
| No     | Single    | No*   | rs34337514   | 2:121458109_A/T   | GLI2       | intergenic | 0.22   | 0.038  | $4.7 \times 10^{-9}$  | +   | 1     |
| Yes    | Single    | Yes   | rs147932234  | 2:203951846_T/C   | NBEAL1     | intronic   | -0.15  | 0.025  | $4.8 \times 10^{-9}$  | --  | 254   |
| Yes    | Single    | No    | rs2868125    | 4:81955408_T/G    | BMP3       | intronic   | 0.27   | 0.041  | $3.2 \times 10^{-11}$ | +   | 1     |
| Yes    | Single    | No    | rs576614613  | 6:7442904_T/C     | RIOK1      | intergenic | -0.26  | 0.043  | $1.1 \times 10^{-9}$  | -?  | 5     |
| Yes    | Single    | No    | rs34945893   | 7:9691418_A/T     | AC096553.5 | intergenic | 0.26   | 0.041  | $2.9 \times 10^{-10}$ | +   | 1     |
| No     | Single    | No*   | rs1544558    | 7:33508624_T/G    | BBS9       | intronic   | 0.26   | 0.042  | $8.8 \times 10^{-10}$ | +   | 1     |
| Yes    | Single    | Yes   | rs3918226    | 7:150690176_C/T   | NOS3       | intronic   | 0.17   | 0.03   | $3.2 \times 10^{-8}$  | ++  | 1     |
| No     | Single    | No    | rs7016007    | 8:5781499_G/T     | MCPH1      | intergenic | -0.28  | 0.05   | $2.4 \times 10^{-8}$  | -?  | 1     |
| Yes    | Single    | No    | rs56097134   | 8:37067371_G/A    | KCNU1      | intergenic | -0.24  | 0.037  | $5 \times 10^{-11}$   | --  | 1     |
| Yes    | Single    | No*   | rs1472790078 | 8:41141915_A/G    | SFRP1      | intronic   | 0.28   | 0.042  | $1.7 \times 10^{-11}$ | +   | 1     |
| No     | Single    | No    | rs10814885   | 9:4209824_C/G     | GLIS3      | intronic   | 0.24   | 0.044  | $2.9 \times 10^{-8}$  | +   | 1     |
| Yes    | Single    | No    | rs111991434  | 9:89155924_A/G    | TUT7       | intergenic | 0.28   | 0.043  | $1.2 \times 10^{-10}$ | +   | 1     |
| Yes    | Single    | No*   | rs58771640   | 11:19767929_T/A   | NAV2       | intronic   | -0.34  | 0.043  | $1.7 \times 10^{-15}$ | -?  | 1     |
| Yes    | Single    | No*   | rs4625573    | 12:24378427_T/C   | SOX5       | intronic   | 0.27   | 0.048  | $2 \times 10^{-8}$    | +   | 1     |
| Yes    | Single    | Yes   | rs1876263690 | 12:111907431_A/AC | ATXN2      | intronic   | 0.098  | 0.016  | $2.4 \times 10^{-9}$  | ++  | 10    |
| No     | Single    | Yes   | rs77215829   | 12:112618346_A/C  | HECTD4     | intronic   | 0.14   | 0.024  | $7.8 \times 10^{-9}$  | ++  | 2     |
| No     | Single    | No*   | rs2352955    | 19:7152404_A/G    | INSR       | intronic   | 0.23   | 0.035  | $1.2 \times 10^{-10}$ | ++  | 1     |
| Yes    | Single    | Yes   | rs55766194   | 19:45013423_A/G   | TOMM40     | intronic   | 0.29   | 0.048  | $2.2 \times 10^{-9}$  | +   | 9     |
| Yes    | Single    | No    | rs6076475    | 20:360933_A/C     | TRIB3      | upstream   | 0.41   | 0.052  | $6.7 \times 10^{-15}$ | +   | 1     |
| No     | Single    | No    | rs1569677    | 20:24404965_A/G   | SYNDIG1    | intergenic | 0.22   | 0.04   | $3 \times 10^{-8}$    | +   | 1     |
| Yes    | Single    | Yes   | rs28451064   | 21:35593827_G/A   | MRPS6      | intergenic | 0.14   | 0.024  | $2.5 \times 10^{-8}$  | ++  | 1     |
| Yes    | Recurrent | Yes   | rs4618978    | 1:222779187_C/G   | MIA3       | intergenic | -0.15  | 0.028  | $3.6 \times 10^{-8}$  | --  | 5     |
| Yes    | Recurrent | No    | rs59875208   | 14:26557764_C/A   | NOVA1      | intergenic | -0.23  | 0.042  | $2.2 \times 10^{-8}$  | --  | 1     |

**Table 3.** Myocardial Infarction (MI) variants that are significant in the GWAS meta analysis. The lead variant (lowest *p*-value) for each independent region is listed. The "Mifull" column describes if the given variant (or any of the significant variants in this region) is also identified in the full MI GWAS meta analysis. The "MI Study" column shows in which of our studies the variant/region was found to be significant (an entry of "common" means that it was present in both the single and the recurrent GWAS meta analysis). The "Known" column shows if this region is previously related to MI ("Yes"), a relevant CVD-trait ("No\*"), or neither ("No"). The next columns are "rsID," nearest gene, the function of the lead SNP as well as effect size, standard error, and *p*-value from the meta-analysis. "Dir" corresponds to the direction of the effect in the HUNT and UKBB GWAS meta-analysis respectively (a value "?" indicates that it was not included in the meta-analysis - see Additional File 4 for allele frequencies), and "Nsnps" shows the number of significant SNPs in the region.

### 331 3.3 Identification of additional phenotypes affected by SNPs through PheWas

332 To delve deeper into the genetic distinctions observed between single and recurrent AF and MI, we  
 333 conducted a PheWAS (Phenome-Wide Association Study) analysis. This enabled us to pinpoint other  
 334 phenotypes that are associated with the same set of SNPs that were designated as either common or unique  
 335 for single and recurrent AF and MI.

336 Our PheWAS investigation of the SNPs identified as common for both single and recurrent AF revealed  
 337 a total of 1,903 SNPs which were linked with 236 phenocodes (shown in Fig. 3 and Additional File  
 338 2). Not surprisingly, the strongest associations were found for *Atrial fibrillation and flutter* and *Cardiac*  
 339 *dysrhythmia* (*p*-value  $10^{-400}$  and  $10^{-220}$ ). Furthermore, we discerned robust associations to phenocodes  
 340 related to *Appendiceal conditions* and *Coagulation defects*. Notably, the circulatory system category  
 341 emerged as the predominant category, encompassing 54 phenocodes. This includes, but is not limited  
 342 to, conditions such as *Phlebitis and thrombophlebitis*, *Sinoatrial node dysfunction (Bradycardia)*, *Heart*  
 343 *failure*, and *Hypertension*.

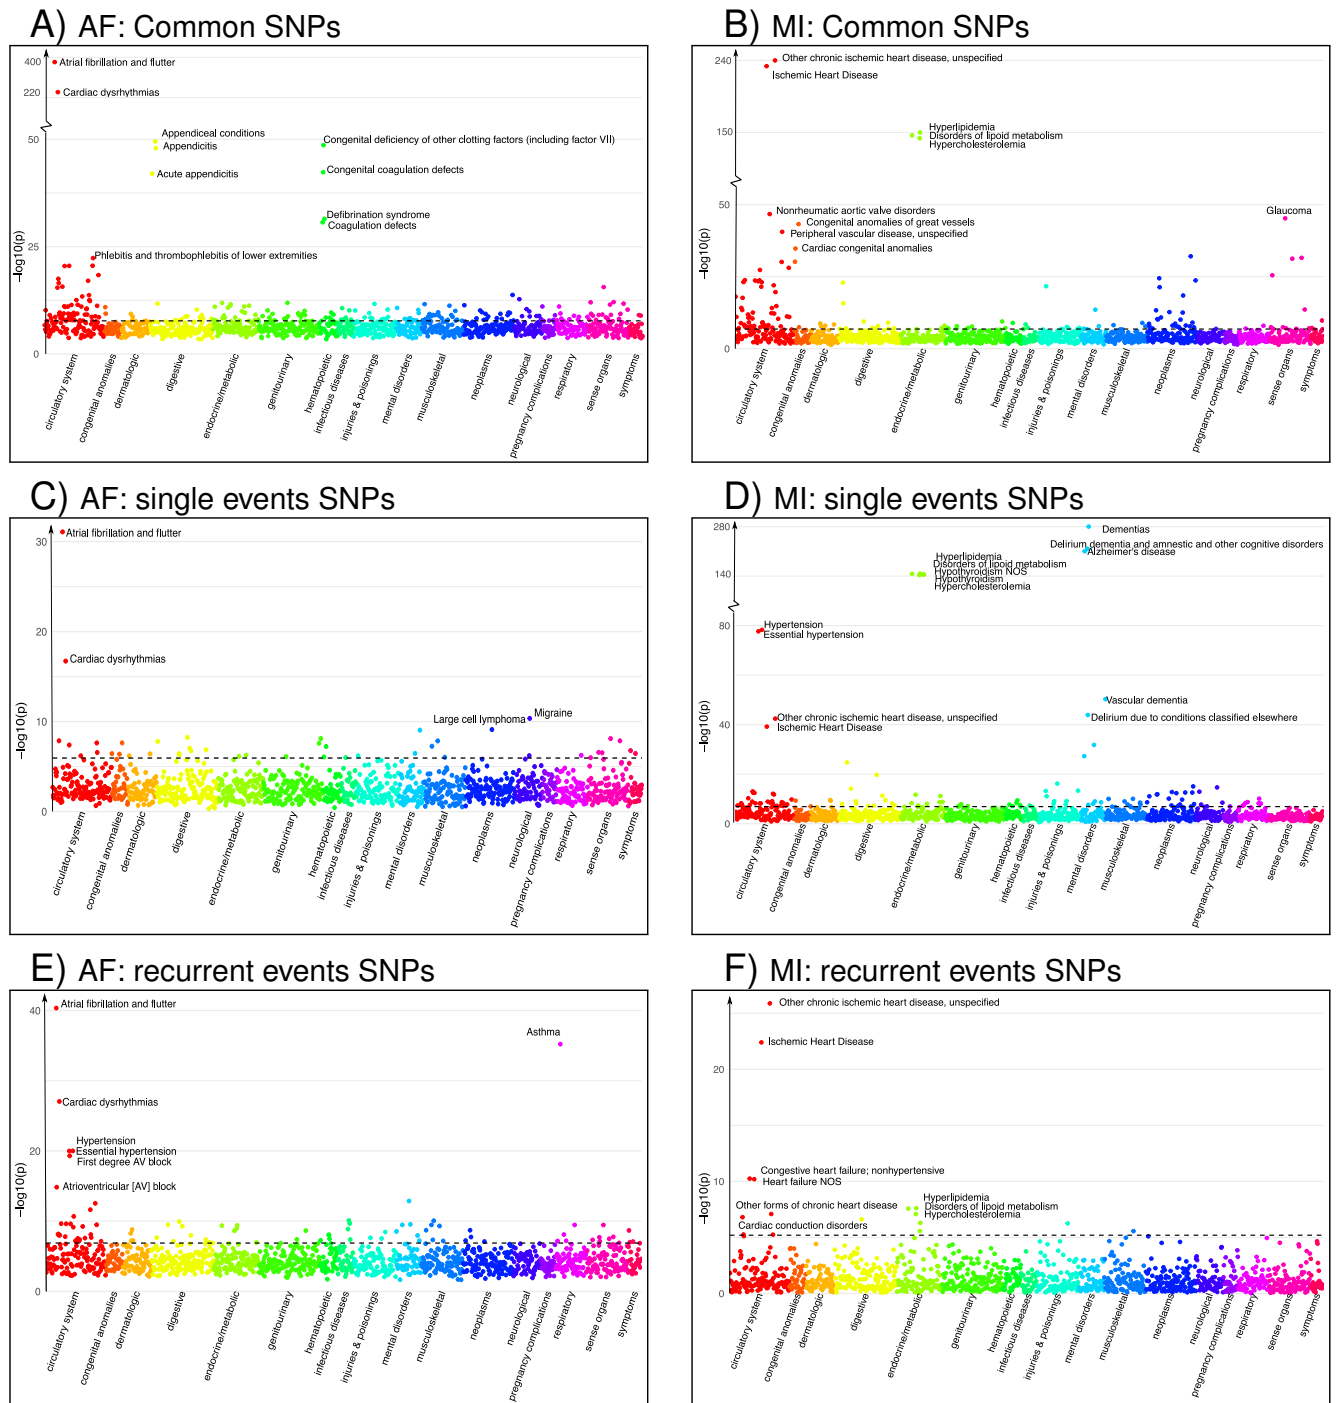

**Figure 3.** Phenocodes associated with each set of SNPs found for both single and recurrent AF/MI or uniquely for one of them. The *x*-axis shows each of the 1326 phenocodes sorted by phenocode category, and the *y*-axis shows the lowest *p*-value for the association between the phenocode and the SNPs in the set. The dotted line shows the threshold for significant associates, which vary according to the number of SNPs in each set. A) set of 1,903 SNPs found in common for both single and recurrent AF. B) set of 245 SNPs found in common for both single and recurrent MI. C) set of 33 SNPs found uniquely for single AF events. D) set of 299 SNPs found uniquely for single MI events. E) set of 286 SNPs found uniquely for recurrent AF events. F) set of 6 SNPs found uniquely for recurrent MI events.

Hall et al.

---

344 Intriguingly, the two identified regions specifically associated with single AF consist of 33 SNPs  
345 that exhibit significant association with 44 phenocodes (see Additional File 2). Not surprisingly, the  
346 strongest associations for these SNPs pertain to the phenocodes *Atrial fibrillation and flutter* and *Cardiac*  
347 *dysrhythmias*, the remaining 42 phenocodes span a diverse array of phenocode categories. These include  
348 not only *Migraine* and *Large cell lymphoma*, but also conditions such as *Arrhythmia (cardiac) NOS*,  
349 *Paroxysmal supraventricular tachycardia*, and *Cerebral atherosclerosis*.

350 In contrast, the 18 regions specifically associated with recurrent AF events consisting of 286 SNPs  
351 show significant association with 91 phenocodes (see Additional File 2), and a majority of the strong  
352 associations pertain to phenocodes of the circulatory system category. Again, the phenocode with the  
353 most potent associations are *Atrial fibrillation and flutter*, and *Cardiac dysrhythmias*. Additionally, these  
354 SNPs also display strong significant associations with *Asthma* and 27 phenocodes from the circulatory  
355 system, including conditions such as *Hypertension*, *Atrioventricular block*, *Cardiomyopathy*, *Heart failure*,  
356 *Ischemic heart disease*, *Cardiac arrest*, and *Palpitations*. Collectively, these results underscore genetic  
357 susceptibility disparities between patients experiencing single versus recurrent AF events. Specifically,  
358 SNPs specifically tied to recurrent AF are linked to a broad range of phenocodes related to the heart and  
359 circulatory system compared to SNPs specifically associated to single AF events.

360 Regarding MI, we identified four regions associated with both single and recurrent MI, comprising 245  
361 SNPs that exhibit significant associations to 144 phenocodes (see Additional File 2). The most prominent  
362 associations are observed with *Ischemic heart disease* and *Hyperlipidemia* disorders. Additionally,  
363 numerous diseases within the circulatory system category, such as *Nonrheumatic aortic valve disorders*,  
364 *Peripheral vascular disease*, *Stricture of artery*, *Hypertension*, and *Heart valve disorders*, are also strongly  
365 associated.

366 The 24 regions specifically identified for single MI events consist of 299 SNPs that are associated with  
367 128 phenocodes (see Additional File 2). These include *Ischemic heart disease*, *Hypertension*, and diseases  
368 of *Hyperlipidemia*. Additionally, there are strong associations with neurodegenerative disorders, such  
369 as *Dementia*, *Alzheimer's*, and *Delirium*. These SNPs are furthermore linked with 33 phenocodes from  
370 the circulatory system category, highlighting conditions such as *Cerebral ischemia*, *Cardiac conduction*  
371 *disorders*, *Heart failure*, *Aortic valve disease*, and *Pulmonary heart disease*.

372 Notably, the two regions consisting of 6 SNPs specifically identified for recurrent MI were associated  
373 with a mere 16 phenocodes (see Additional File 2). While these included *Ischemic heart disease*, *Heart*  
374 *failure*, *Cardiac conduction disorders*, and diseases of *Hyperlipidemia*, they lacked the other 27 circulatory  
375 system disorders identified for the single MI SNPs. Once again, these findings emphasise the genetic  
376 differences between patients experiencing single and recurrent MI. SNPs specifically associated with single  
377 MI events appear to be associated with a broader and more diverse range of cardiovascular disorders  
378 compared to those solely linked to recurrent MI.

### 379 **3.4 Gene sets and co-expression network neighbourhood**

380 In our final analysis, we leverage multiple sets of gene expression data from the GTEx consortium  
381 (30) measured in tissue sub-types taken from heart, muscle, skeletal, artery, and kidney to generate gene  
382 co-expression networks (see Methods for details). Here, our expectation is that highly correlated genes  
383 have a regulatory relationship or similar response in a condition (29). Thus, this approach should uncover  
384 genes that display an expression profile that most closely links to the set of target genes found through our  
385 GWAS analyses, and we investigate their functions.

### 386 3.4.1 AF associated genes in co-expression networks

387 Differential gene expression analysis of the 18 genes identified in recurrent AF (listed as Recurrent  
 388 in Tab. 2) reveals a significant up-regulation of these genes in atrial appendage tissues from the heart.  
 389 Furthermore, elevated expression levels are discerned in left ventricular heart, artery tibial, and muscle  
 390 skeletal tissues (see Additional File 1, Fig. S9). Gene ontology analysis indicates that this set of genes  
 391 is significantly enriched for cell-cell signaling involved in cardiac conduction, (Fold Enrichment (FE)  
 392  $> 100$ ,  $FDR = 1.17 \times 10^{-2}$ ), cardiac muscle cell action potential ( $FE = 70.03$ ,  $FDR = 3.15 \times 10^{-2}$ ), and  
 393 regulation of heart rate ( $FE = 43.99$ ,  $FDR = 1.62 \times 10^{-2}$ ).

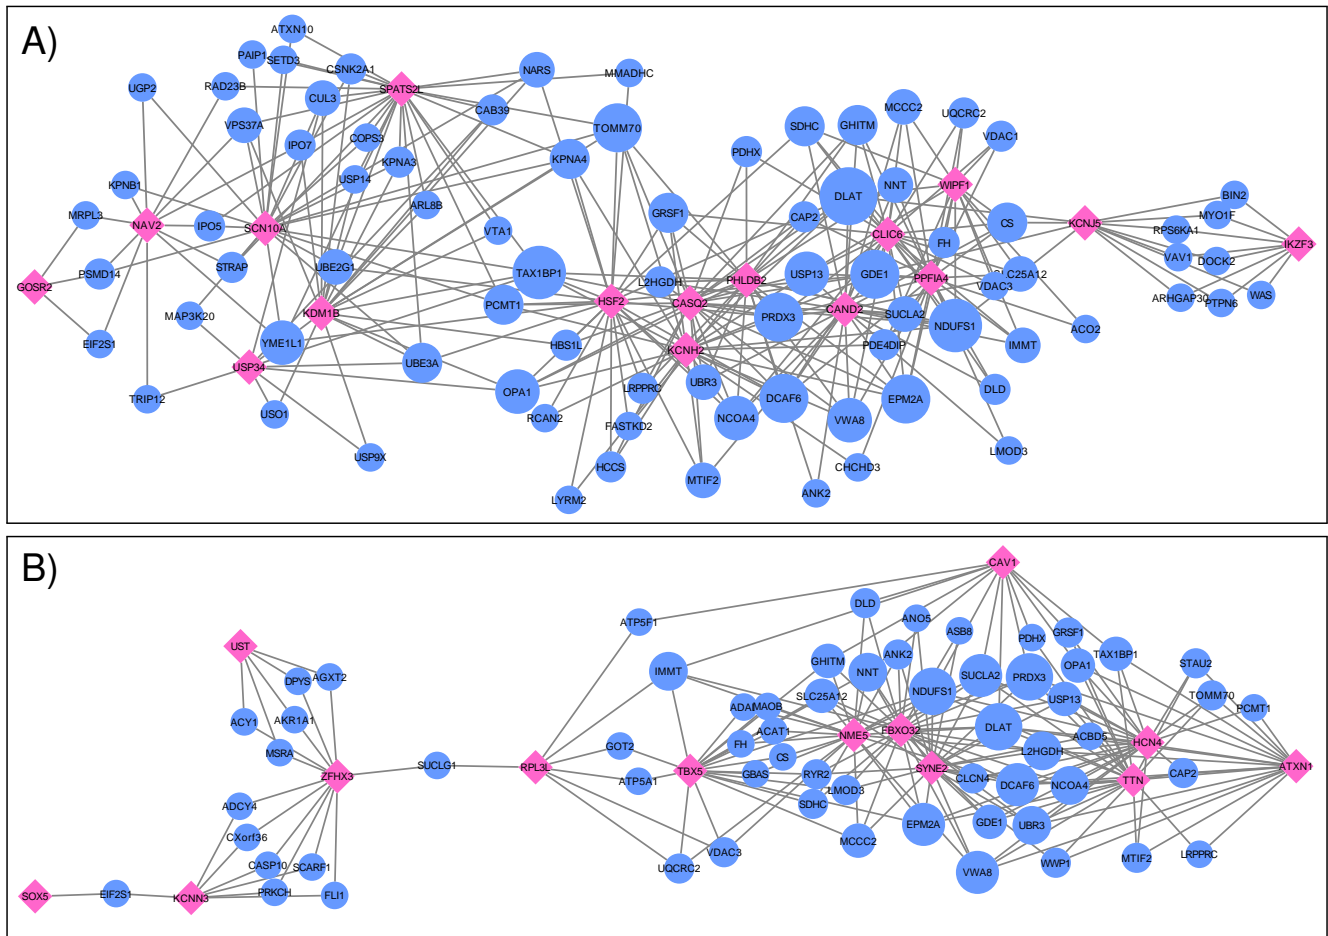

**Figure 4.** Networks showing the strongest shared neighbourhood of co-expressed genes for the GWAS (target) genes associated with A) recurrent AF uniquely and B) both single and recurrent AF. Pink diamond nodes represent the target genes and blue circular nodes represent the neighbouring genes. The sizes of the blue nodes are scaled according to their number of nearest neighbours in the network.

394 Following the co-expression analysis approach detailed in the Methods section, we find that 16 of the 18  
 395 recurrent AF genes show strong co-expression with other genes in heart, artery, kidney, and muscle skeletal  
 396 tissues. Selecting the top-25 genes with the strongest connection to each of the 16 target genes, Fig. 4 A)  
 397 shows that all of the 16 target genes are connected through 82 shared neighbouring genes (see Additional  
 398 File 3), i.e. the 82 shared genes are among the top-25 strongest connections for two or more of the  
 399 target genes. These 82 neighbouring genes are significantly enriched for a variety of biological processes,  
 400 including acetyl-CoA biosynthetic process from pyruvate ( $FE > 100$ ,  $FDR = 4.41 \times 10^{-3}$ ), tricarboxylic

401 acid cycle (FE= 54.70, FDR =  $1.38 \times 10^{-6}$ ), NLS-bearing protein import into nucleus (FE = 50.99,  
402 FDR =  $1.93 \times 10^{-3}$ ), inner mitochondrial membrane organization (FE = 32.73, FDR =  $9.49 \times 10^{-4}$ ),  
403 respiratory electron transport chain (FE = 10.72, FDR =  $4.32 \times 10^{-2}$ ), regulation of proteasomal protein  
404 catabolic process (FE = 7.49, FDR =  $4.94 \times 10^{-2}$ ), proteasome-mediated ubiquitin-dependent protein  
405 catabolic process (FE = 5.58, FDR=  $3.79 \times 10^{-2}$ ), and regulation of cellular catabolic process (FE = 4.01,  
406 FDR=  $9.85 \times 10^{-3}$ ).

407 Focusing on the two genes specific to single AF events (listed as *Single* in Tab. 2), our analysis reveals  
408 that these genes shows significant up-regulation in left ventricle tissues of the heart and also high expression  
409 levels for atrial appendage tissues of the heart (see Additional File 1, Fig. S10). Gene ontology analysis  
410 confirms that these genes are closely linked to adult heart development (FE> 100, FDR =  $7.77 \times 10^{-3}$ ),  
411 ventricular cardiac muscle tissue morphogenesis (FE> 100, FDR =  $4.17 \times 10^{-2}$ ), myofibril assembly  
412 (FE> 100, FDR =  $2.98 \times 10^{-2}$ ), cardiac muscle contraction (FE> 100, FDR =  $2.47 \times 10^{-2}$ ), and  
413 regulation of striated muscle contraction (FE> 100, FDR =  $2.87 \times 10^{-2}$ ). Thus, although both target  
414 genes exhibit the specified enriched functions, an egocentric network analysis reveals that they do not  
415 share mutual genes with strong co-expression across the heart, artery, kidney, and skeletal muscle tissues.  
416 Therefore, while they may have functional overlap, their co-expressing gene partners diverge for each  
417 target gene.

418 In our comparative analysis of gene sets uniquely associated with either single or recurrent AF, we also  
419 evaluated genes that were consistent across both AF categories. Among the 16 genes identified for both  
420 AF groups (labelled as *Common* in Tab. 2), there was a significant up-regulation in tissues of the heart's  
421 left ventricle, atrial appendage, and skeletal muscles (see Additional File 1, Fig. S11). Notably, these  
422 genes did not show any enrichment in specific gene ontology categories. Upon conducting an egocentric  
423 network analysis, we found that 14 out of these 16 genes displayed strong co-expression patterns with  
424 genes differentially expressed in the heart, arteries, kidneys, and skeletal muscles. Moreover, 13 of these  
425 genes were interconnected via 61 shared neighbor genes (see Fig.4 B) and Additional File 3). The 61 genes  
426 found in common for the 13 target genes show significant enrichment for fumarate metabolic process (FE  
427 > 100, FDR =  $1.83 \times 10^{-2}$ ), regulation of atrial cardiac muscle cell action potential (FE > 100, FDR  
428 =  $2.51 \times 10^{-2}$ ), regulation of mitochondrial RNA catabolic process (FE> 100, FDR =  $3.36 \times 10^{-2}$ ),  
429 mitochondrial acetyl-CoA biosynthetic process from pyruvate (FE > 100, FDR =  $3.32 \times 10^{-2}$ ), succinyl-  
430 CoA catabolic process (FE > 100, FDR =  $4.10 \times 10^{-2}$ ), tricarboxylic acid cycle (FE = 73.80, FDR  
431 =  $5.34 \times 10^{-8}$ ), branched-chain amino acid catabolic process (FE = 46.69, FDR =  $1.11 \times 10^{-2}$ ), inner  
432 mitochondrial membrane organization (FE= 35.33, FDR =  $2.16 \times 10^{-3}$ ), aerobic electron transport chain  
433 (FE = 15.20, FDR =  $2.98 \times 10^{-2}$ ), mitochondrial ATP synthesis coupled electron transport (FE = 14.37,  
434 FDR =  $3.50 \times 10^{-2}$ ), and alpha-amino acid catabolic process (FE = 14.21, FDR =  $3.53 \times 10^{-2}$ ).

435 Thus, the gene sets identified in common and uniquely for single and recurrent AF events are up-regulated  
436 in atrial appendage tissues of the heart, left ventricular tissues of the heart, and muscle skeletal tissues,  
437 where the gene set identified for recurrent AF and single AF events show significant up-regulation in atrial  
438 appendage and left ventricular tissues of the heart, respectively, while the gene set identified for both single  
439 and recurrent AF shows significant up-regulation of all three tissues. While both gene sets specifically  
440 identified for single and recurrent AF events show enrichment for functions related to heart and cardiac  
441 muscle, the recurrent AF gene set shows interesting enrichment of functions related to regulation of heart  
442 rate and cardiac muscle cell action potential. Collectively, these findings underscore the distinct genetic  
443 underpinnings between patients experiencing isolated versus recurrent AF events, with the recurrent AF  
444 genes revealing more intricate processes.



### 445 3.4.2 Network MI

446 The 24 nearest genes to the regions specifically identified for single MI events (listed as Single in Tab. 3)  
447 show no significant enrichment for any gene ontology terms. Differential gene expression analysis shows  
448 no significant up or down regulation of these genes in any tissue, but significant expression levels in tibial  
449 nerve and high expression levels in tibial artery and aorta artery tissues (see Additional File 1, Fig S12).

450 When inspecting gene co-expression in heart, artery, kidney, and muscle skeletal tissues, we find that  
451 21 of these genes show high co-expression with other genes in these tissues. Again creating egocentric  
452 networks for each of these 21 target genes, we find that all 21 target genes cluster in a giant component,  
453 where 110 genes are connected to two or more of them. The network depicted in Fig. 5 A) illustrates genes  
454 that are interconnected with multiple single MI target genes. Notably, there's a dense cluster in the upper  
455 left portion of the figure, dominated by GLI2, GLIS3, TRIB3, and SFRP1, all of which are interconnected  
456 and share a majority of their neighborhood genes. The known associations of both GLI2 and SFRP1 with  
457 CVD-related traits, coupled with the detection of TRIB3 and SFRP1 in the comprehensive MI GWAS,  
458 suggest potential shared functional roles of these four genes. Furthermore, they also exhibit significant  
459 interconnections with BBS9, HECTD4, ATXN2, and SYNDIG1. It's worth noting that HECTD4 and  
460 ATXN2 have recognized associations with MI.

461 Gene ontology analysis of the 110 genes shared between two or more target genes (see Additional File  
462 3) show significant enrichment for positive regulation of several functional categories, more specifically  
463 establishment of protein localization to telomere ( $FE = 54.18, FDR = 1.95 \times 10^{-2}$ ), positive regulation  
464 of protein localization to Cajal body ( $FE = 49.26, FDR = 2.28 \times 10^{-2}$ ), NLS-bearing protein import  
465 into nucleus ( $FE = 38.02, FDR = 3.85 \times 10^{-3}$ ), positive regulation of telomerase RNA localization  
466 to Cajal body ( $FE = 36.12, FDR = 4.17 \times 10^{-2}$ ), cristae formation ( $FE = 36.12, 4.00 \times 10^{-2}$ ),  
467 tricarboxylic acid cycle ( $FE = 29.13, FDR = 1.59 \times 10^{-3}$ ), regulation of proteasomal protein catabolic  
468 process ( $FE = 8.38, FDR = 1.63 \times 10^{-3}$ ), regulation of ubiquitin-dependent protein catabolic process  
469 ( $FE = 7.35, FDR = 2.27 \times 10^{-2}$ ), proteasome-mediated ubiquitin-dependent protein catabolic process  
470 ( $FE = 4.68, FDR = 4.76 \times 10^{-2}$ ), purine-containing compound metabolic process ( $FE = 4.21, FDR =$   
471  $4.69 \times 10^{-2}$ ), nucleotide metabolic process ( $FE = 3.84, FDR = 4.69 \times 10^{-2}$ ), and cellular component  
472 biogenesis ( $FE = 2.06, FDR = 3.57 \times 10^{-2}$ ).

473 Upon analyzing the two genes uniquely associated with recurrent MI (listed as Recurrent in Tab. 3), we  
474 observe neither significant enrichment in gene ontology terms nor any distinctive expression patterns across  
475 tissue types (see Additional File 1, Fig. S13). In constructing egocentric networks for these genes, we  
476 identify seven overlapping genes (see Additional File 3) among the top-25 most correlated for each gene,  
477 as depicted in Fig. 5 B). While four of these seven neighboring genes (TOMM70, FASTKD2, MMADHC  
478 and OPA1) are related to mitochondrial function and energy production, gene ontology analysis yielded no  
479 significant enrichment.

480 Investigating the genes that are in common for both MI groups (listed as Common in Tab. 3), we find  
481 no significant differential co-expression in any of the tissues (see Additional File 1, Fig. S14). No gene  
482 ontology terms were found to be significantly enriched for these four genes. The egocentric networks  
483 (Fig. 5 C)) revealed that three of them are linked through 18 shared neighborhood genes (see Additional  
484 File 3). The 18 genes connecting the three target genes show significant enrichment for mitochondrial  
485 acetyl-CoA biosynthetic process from pyruvate ( $FE > 100, FDR = 5.92 \times 10^{-3}$ ), tricarboxylic acid  
486 cycle ( $FE > 100, FDR = 5.37 \times 10^{-7}$ ), negative regulation of release of cytochrome c from mitochondria  
487 ( $FE > 100, FDR = 4.88 \times 10^{-2}$ ), cell redox homeostasis ( $FE = 81.70, FDR = 3.38 \times 10^{-3}$ ), aerobic

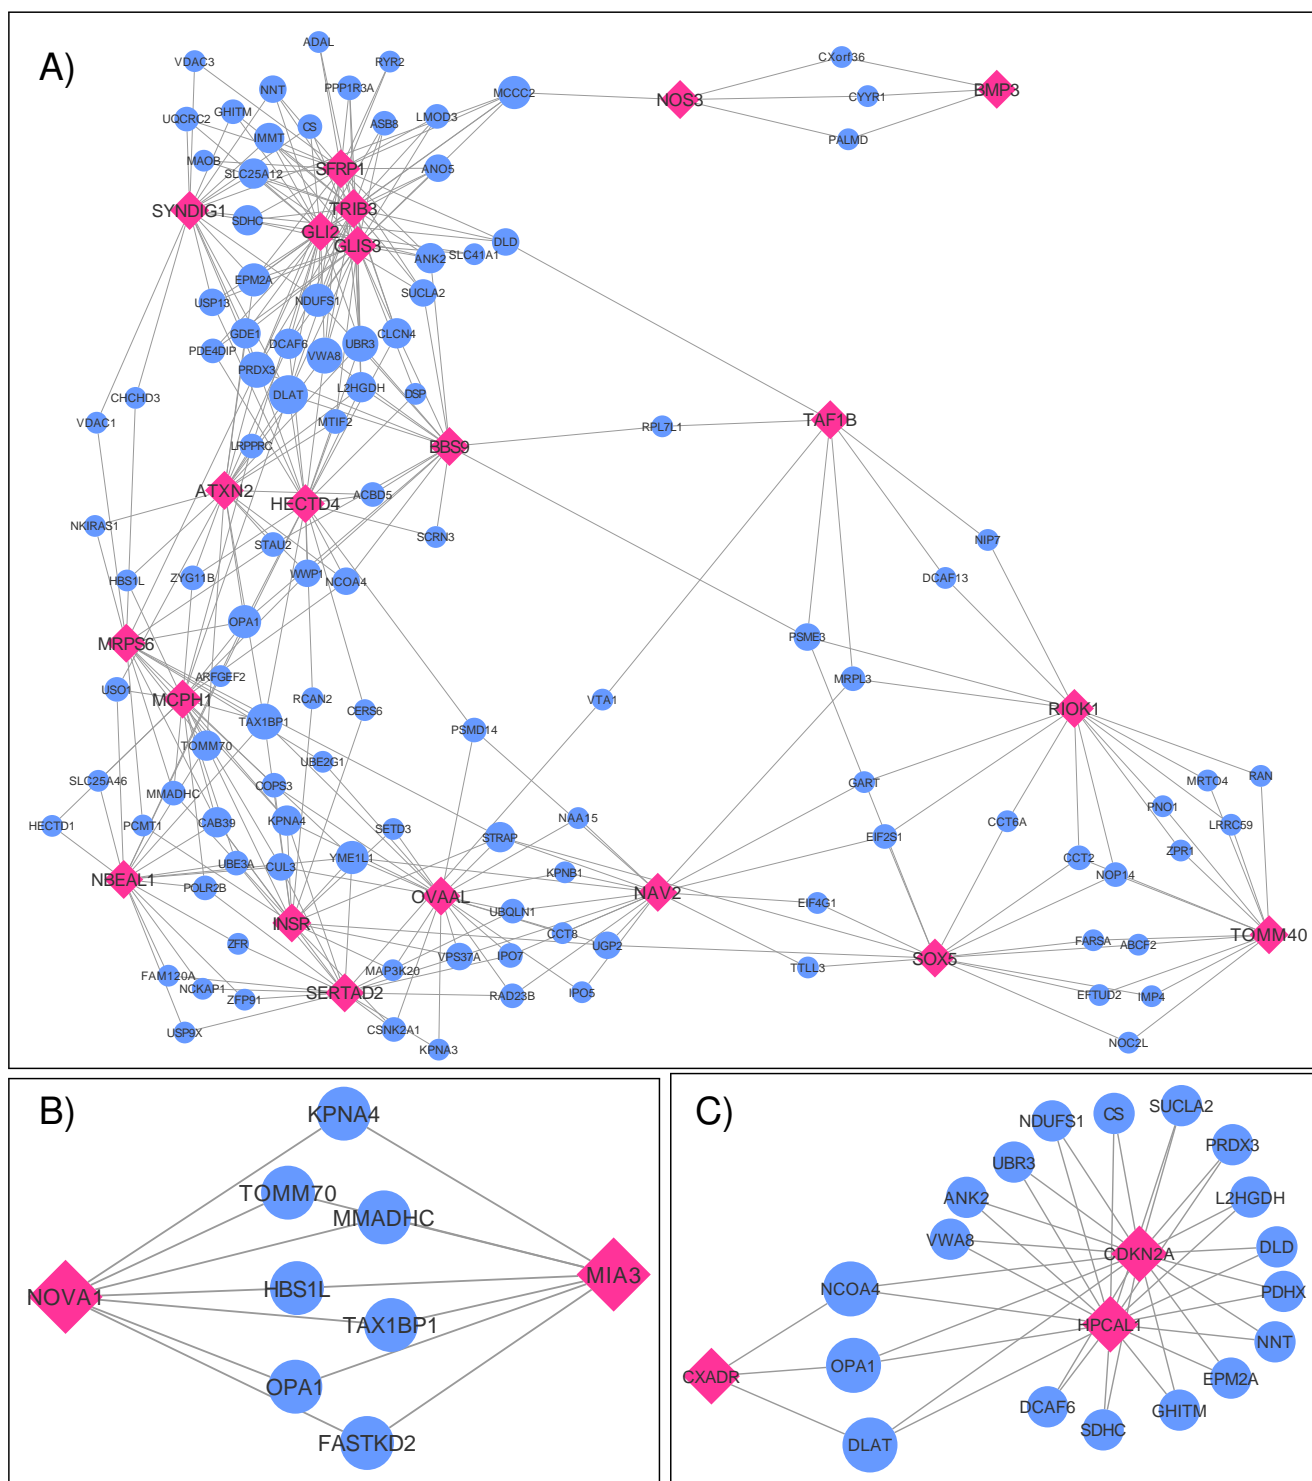

**Figure 5.** Networks showing the strongest shared neighbourhood of co-expressed genes for the GWAS (target) genes associated with A) single MI uniquely, B) recurrent MI uniquely and C) both single and recurrent MI. Pink diamond nodes represent the target genes and blue circular nodes represents the neighbouring genes. The sizes of the blue nodes are scaled according to their number of nearest neighbours in the network.

488 electron transport chain (FE = 39.90, FDR =  $2.07 \times 10^{-2}$ ), mitochondrial ATP synthesis coupled electron

489 transport (FE = 37.71, FDR =  $2.38 \times 10^{-2}$ ), reactive oxygen species metabolic process (FE = 32.68,  
490 FDR =  $3.25 \times 10^{-2}$ ), and mitochondrion organization (FE = 12.85, FDR =  $1.15 \times 10^{-2}$ ).

491 In summary, MI gene sets do not exhibit notable tissue specificity or functional enrichment. Yet, the  
492 gene sets linked to both common and single MI incidents share multiple genes within their co-expression  
493 network neighborhoods. These shared genes exhibit functional enrichment for several pertinent processes.  
494 Conversely, the shared gene neighborhood specifically related to recurrent MI does not present any  
495 functional enrichment. However, some of the genes are related to mitochondrial function and energy  
496 production, similar to several of the enriched functions for the shared neighbouring genes for common MI  
497 genes. Notably, the neighbouring genes of the single MI genes shows significant enrichment for several  
498 function not identified for the recurrent of common neighbouring gene sets. Only one of the biological  
499 processes identified in the neighborhood of single MI genes is also seen in the neighborhood of common  
500 genes. This suggests unique functions associated with genes specific to single MI incidents, shedding light  
501 on potential reasons why certain patients experience only one MI event.

## 4 DISCUSSION

502 The study demonstrates distinct clinical characteristics and genetic predispositions between patients who  
503 experience a single atrial fibrillation/myocardial infarction (AF/MI) event and those with recurrent events.  
504 Notably, the single AF and single MI patient groups represent relapse-free patients, where we have filtered  
505 the data to ensure they have only experienced one event, with a buffer of at least 5 years for AF and 7 years  
506 for MI since the episode and before the study either ended or the patient died.

507 Single AF incidents appear more influenced by lifestyle factors and age, with only two unique genetic  
508 regions identified. In contrast, patients with recurrent AF are typically younger at their first event and exhibit  
509 a stronger genetic basis, as evidenced by 18 unique genetic regions linked to recurrent AF. Among these,  
510 two regions are near the NAV2 and SCN10A genes, previously hypothesized, but unconfirmed (36, 35)  
511 ( $N = 42$ , 585 East Asian population,  $N = 660$  German population), to affect recurrent AF. The region with  
512 the lowest  $p$ -values and also the largest amount of significant SNPs was found near the PITX2 gene for both  
513 the single and the recurrent AF groups. Though PITX2 is the most known gene associated with recurrent  
514 AF (10, 7, 1) ( $N = 295$  Turkish population,  $N = 195$  Caucasian population,  $N = 991$  German and  
515 American population), our results give no indication of such an effect. This observation extends to six other  
516 genes (SOX5, CAV1, EPHX2, ITGA9, SLC8A1, and TBX5) (35, 10, 8) ( $N = 660$  German population,  
517  $N = 295$  Turkish population,  $N = 42$ , 585 East Asian population,  $N = 486$  Caucasian population), where  
518 variants near the SOX5, CAV1 and TBX5 genes are identified in both the single and recurrent AF group,  
519 and no variants near the EPHX2, ITGA9 and SLC8A1 genes are identified in any of the groups. PheWAS  
520 analysis of these unique single and recurrent AF SNPs further highlight distinct susceptibilities: SNPs  
521 associated with single AF correlate with 44 phenocodes across various categories, whereas recurrent AF  
522 SNPs are linked to 91 phenocodes, predominantly in the circulatory system category. Network analysis of  
523 gene sets revealed that 16 of the 18 genes associated with recurrent AF are connected through 82 shared,  
524 highly co-expressed neighboring genes. These recurrent AF genes, along with their neighboring genes, are  
525 involved in complex processes related to heart rate regulation and cardiac muscle cell action potential. In  
526 contrast, the two genes associated with single AF events are linked to heart and cardiac muscle processes  
527 but do not share highly co-expressed genes.

528 We also find distinct clinical and genetic differences between patients with single and recurrent MI.  
529 Unlike AF, recurrent MI is more associated with older age at first MI event, lifestyle factors, and age-related

530 issues. This is despite the fact that the single MI group is adjusted for early death due to MI and/or related  
531 comorbidities, and this should not affect the results. The genetic predisposition seems stronger in single  
532 MI cases, with a total of 24 uniquely associated regions. In contrast, recurrent MI is only associated with  
533 two regions that did not share the association with single MI cases. Of the 24 genetic regions uniquely  
534 identified for single MI, 14 are previously known for MI or other CVD-related traits. The remaining 10 are  
535 novel for MI and have previously not been reported for other CVD-related traits. While most of these novel  
536 regions consist of single SNPs primarily identified in the HUNT population, their nearest genes code for  
537 functions similar to known MI regions. Looking into the allele frequencies in each population (Additional  
538 File 4), we see that these variants are rather common in HUNT and in the general European population  
539 (based on reporting from gnomAD (37)), while they are rare variants in the UKBB population and thereby  
540 not included in the META-analysis. Further studies are needed to investigate if these variants show similar  
541 effects in other European and non-European populations.

542 PheWAS analysis reinforces the genetic distinction between single and recurrent MI groups. The single  
543 MI group's SNPs are linked to 128 phenotypes, predominantly in the circulatory system category, with  
544 additional associations in the endocrine/metabolic category and notable links to neurodegenerative disorders.  
545 In contrast, the SNPs related to recurrent MI correlate with 16 phenocodes, involving both circulatory and  
546 endocrine/metabolic categories, but the associations are not as pronounced as those in the single MI group.  
547 Our network analysis reveals distinct gene interactions for each group. Of the 24 genes uniquely associated  
548 with single MI, 21 share connections with 110 genes in the co-expression network. However, the two genes  
549 associated with recurrent MI have seven highly co-expressed genes. This indicates more extensive genetic  
550 interconnections in single MI cases. Interestingly, the shared neighbouring genes for single MI, and those  
551 common to both single and recurrent MI, show functional enrichment in several biological processes. In  
552 contrast, the shared neighboring genes for recurrent MI do not show significant functional enrichment. This  
553 disparity suggests distinct biological pathways involved in single versus recurrent MI events. Moreover,  
554 only one function is common between the shared genes for both single and recurrent MI, suggesting unique  
555 biological mechanisms specific to single MI events.

556 The results suggest a greater genetic influence in atrial fibrillation (AF) compared to myocardial infarction  
557 (MI), but several factors could affect this perception. Clinically, it's expected that more genes would increase  
558 the risk of recurrent AF, a pattern observed in this study. In contrast, the findings for MI are opposite,  
559 potentially influenced by their higher ages: MI becomes less common in younger individuals, and in  
560 older populations, comorbidities often overshadow genetic risk factors. There could also be physiological  
561 reasons behind these observations. For instance, MI in younger individuals might more frequently result  
562 from genetic factors related to platelet aggregation or atherosclerosis, conditions that are generally more  
563 responsive to treatment. In older individuals, MI might be more associated with broader age-related issues,  
564 reducing the relative impact of genetics. The reporting of these conditions could also influence the results,  
565 with AF potentially being under-reported compared to MI, which itself is possibly over-reported. This  
566 discrepancy could explain why phenocodes related to neurodegenerative disorders and cerebral ischemia  
567 emerge as significant only in single MI cases in the PheWAS results. These findings might be influenced  
568 by diagnostic practices where MI is often recorded as a cause of death, even when other diseases are the  
569 actual cause, or in cases where individuals die before a recurrent event occurs. The latter has been adjusted  
570 for by excluding individuals with single events with less than 7 years between the event and the censoring  
571 date, being either death or the end of the study. Still, even with this adjustment, some single MI event cases  
572 might be censored out before a second event, possibly influencing the the case groups and thereby the  
573 results.

574 The observed differences in clinical characteristics for both diseases might be even more pronounced if  
575 the HUNT and UK Biobank (UKBB) studies had used similar questionnaire formats. In the HUNT study,  
576 participants involved in both HUNT2 and HUNT3 provided cholesterol and blood pressure measurements  
577 taken eleven years apart. We opted to use the measurements recorded closest to the first AF or MI event,  
578 as we believe these offer the most relevant information. However, for the UKBB participants, most were  
579 measured only once, eliminating the option to choose measurements nearest to the event. This discrepancy  
580 in data collection methodology could explain why significant differences in cholesterol and blood pressure  
581 measurements are observed between single and recurrent event groups in the HUNT population but not in  
582 the UKBB group. The lack of longitudinal data in the UKBB may obscure potential differences that are  
583 more apparent in the HUNT study due to its repeated measurements.

584 In any GWAS study, larger sample sizes, diverse ancestry representation, and result replication are crucial.  
585 The HUNT study, comprised solely of individuals of European ancestry, led us to select only European  
586 ancestry participants from the UKBB for consistency. However, for global applicability, conducting similar  
587 analyses across all ancestries is essential. Regarding sample sizes, while the combined participant pool  
588 of HUNT and UKBB exceeds 500,000, the specific filtering and subgrouping in our study result in some  
589 case/control groups having fewer than 2,000 individuals. This reduced size may limit our ability to achieve  
590 robust significant findings. The small sample sizes might explain the prevalence of significant singleton  
591 SNP hits (one SNP per region) found only in the HUNT study, with the same SNPs with too rare allele  
592 frequencies in the UKBB population. Increasing sample sizes or including an additional population would  
593 likely enhance the reliability of these findings, particularly since these variants are reported as common in  
594 the general European population. While increasing the sample sizes could verify/dispute or even identify  
595 additional regions, some genetic differences observed between recurrent and single cases might diminish  
596 with larger sample sizes. Although many spikes in the Manhattan plots (Fig.1 and Fig.2) indicate clear  
597 differences between single and recurrent cases, certain regions almost reach significance for the opposite  
598 group, such as the hit on chromosome 8 for recurrent AF. This suggests that some observed genetic  
599 distinctions might be less pronounced with a more substantial and diverse sample.

600 While our meta-analysis did not yield any GWAS significant results when directly comparing recurrent  
601 to single AF or MI cases, the data still indicate genetic differences between these groups. Notably, some  
602 genetic regions were identified in both single and recurrent groups (termed 'common'), while a substantial  
603 number were unique to each group. This could suggest that the common regions may play a role in the  
604 general susceptibility to AF and MI, whereas the unique regions could confer specific genetic risks for the  
605 disease's form (single or recurrent events). Further studies are needed to test the hypotheses generated from  
606 this study, in particular investigate the effect of the novel SNPs and genes identified and their involvement  
607 in either single or recurrent AF/MI. While many of the identified genes and their related function might not  
608 have an direct confirmed effect on AF/MI, we do see some similar functions of the novel genes as for the  
609 known AF/MI genes, showing the potential of identification and understanding of new genetic functions of  
610 the diseases.

611 There has been considerable research aimed at uncovering genetic causes for AF and MI. Our findings  
612 underscore the importance of genetic studies focused on disease subgroups, as conducted here. Both AF  
613 and MI are widespread diseases with varied impacts on individuals' lives. The progression and outcomes of  
614 these diseases are not uniform across all patients. By examining subgroups within these diseases, we could  
615 gain new insights into their mechanisms, potentially leading to more effective prevention and treatment  
616 strategies tailored to different patient profiles.

## DATA AVAILABILITY STATEMENT

617 The Trøndelag Health Study (HUNT) has invited persons aged 13 – 100 years to four surveys between  
618 1984 and 2019. Comprehensive data from more than 140,000 persons having participated at least once  
619 and biological material from 78,000 persons were collected. The data are stored in HUNT databank and  
620 the biological material in HUNT biobank. HUNT Research Centre has permission from the Norwegian  
621 Data Inspectorate to store and handle these data. The key identification in the data base is the personal  
622 identification number given to all Norwegians at birth or immigration, whilst de-identified data are sent to  
623 researchers upon approval of a research protocol by the Regional Ethical Committee and HUNT Research  
624 Centre. To protect participants' privacy, HUNT Research Centre aims to limit storage of data outside  
625 HUNT databank, and cannot deposit data in open repositories. HUNT databank has precise information on  
626 all data exported to different projects and are able to reproduce these on request. There are no restrictions  
627 regarding data export given approval of applications to HUNT Research Centre. For more information see:  
628 <http://www.ntnu.edu/hunt/data>.

629 The UKBB characteristics and genetic data are available for all researchers upon requested.  
630 To identify the number of events per participant, the HESIN-tables were applied. See  
631 <https://biobank.ndph.ox.ac.uk/showcase/> for further information.

632 PheWas analysis were conducted on the Pan UKBB resource (24). See <https://pan.ukbb.broadinstitute.org>.  
633 The mapping from ICD9 and ICD10 codes are available at <https://phewascalog.org/phecodes>.

634 Gene expression matrices were downloaded from the GTEx portal (30), V8. See <https://www.gtexportal.org>.

## ETHICS STATEMENT

635 Participation in the HUNT Study is based on informed consent, and the study has been approved by the  
636 Norwegian Data Inspectorate and the Regional Ethics Committee for Medical Research in Norway (REK:  
637 2014/144). All participants from both UKBB and HUNT who have contributed in this study have provided  
638 their written informed consent to participate.

## AUTHOR CONTRIBUTIONS

639 IS identified the research topic. MH and AHS conceived and designed the study, with that defining the traits  
640 and cohorts, planned the analysis and analysed the characteristics of the cohorts. MH conducted the analysis  
641 and interpreted the results. MH wrote the manuscript. MH, EA, AHS, IS and HD edited and revised the  
642 manuscript. MH, AHS, IS, HD and EA approved the final version of the manuscript.

## FUNDING

643 M.H. and E.A. thank the K. G. Jebsen Foundation for Grant SKGJ-MED-015.

## ACKNOWLEDGMENTS

644 The Trøndelag Health Study (HUNT) is a collaboration between HUNT Research Centre (Faculty of  
645 Medicine and Health Sciences, Norwegian University of Science and Technology NTNU), Trøndelag  
646 County Council, Central Norway Regional Health Authority, and the Norwegian Institute of Public Health.  
647 The genetic investigations of the HUNT Study, is a collaboration between researchers from the K.G.  
648 Jebsen center for genetic epidemiology and University of Michigan Medical School and the University

649 of Michigan School of Public Health. The K.G. Jebsen Center for Genetic Epidemiology is financed by  
650 Stiftelsen Kristian Gerhard Jebsen; Faculty of Medicine and Health Sciences, NTNU, Norway. We would  
651 like to thank clinicians and other employees at Nord-Trøndelag Hospital Trust for their support and for  
652 contributing to data collection in this research project. We would also like to thank all participants that  
653 have contributed in the UKBB study.

## CONFLICT OF INTEREST STATEMENT

654 The authors confirm that there are no conflicts of interest. The authors declare that the research was  
655 conducted in the absence of any commercial or financial relationships that could be construed as a potential  
656 conflict of interest.

## SUPPLEMENTAL DATA

657 Additional File 1 - Fig. S1-S14. S1: QQ-plot of single AF vs. healthy controls in HUNT. S2: QQ-plot of  
658 single AF vs. healthy controls in UKBB. S3: QQ-plot of recurrent AF vs. healthy controls in HUNT. S4:  
659 QQ-plot of recurrent AF vs. healthy controls in UKBB. S5: QQ-plot of single MI vs. healthy controls in  
660 HUNT. S6: QQ-plot of single MI vs. healthy controls in UKBB. S7: QQ-plot of recurrent MI vs. healthy  
661 controls in HUNT. S8: QQ-plot of recurrent MI vs. healthy controls in UKBB. S9: Tissue specificity of the  
662 18 genes uniquely identified for recurrent AF. Test results in each row are Bonferroni corrected and red  
663 bars show tissues where the set of genes are significantly up-regulated (top), down-regulated (middle), and  
664 both-sided (bottom). S10: Tissue specificity for the two genes identified uniquely for single AF. Test results  
665 in each row are Bonferroni corrected and red bars show tissues where the set of genes are significantly  
666 up-regulated (top), down-regulated (middle), and both-sided (bottom). S11: Tissue specificity for the 16  
667 genes identified for both single and recurrent AF. Test results in each row are Bonferroni corrected and red  
668 bars show tissues where the set of genes are significantly up-regulated (top), down-regulated (middle), and  
669 both-sided (bottom). S12: Tissue specificity for the 24 genes identified uniquely for single MI. Test results  
670 in each row are Bonferroni corrected and red bars show tissues where the set of genes are significantly  
671 up-regulated (top), down-regulated (middle), and both-sided (bottom). S13: Tissue specificity for the two  
672 genes identified uniquely for recurrent MI. Test results in each row are Bonferroni corrected and red bars  
673 show tissues where the set of genes are significantly up-regulated (top), down-regulated (middle), and  
674 both-sided (bottom). S14: Tissue specificity for the four genes identified for both single and recurrent MI.  
675 Test results in each row are Bonferroni corrected and red bars show tissues where the set of genes are  
676 significantly up-regulated (top), down-regulated (middle), and both-sided (bottom). S15-S39: Regional  
677 plot of single significant hit identified uniquely for recurrent AF, single MI or recurrent MI.

678 Additional File 2 - Excel file containing all phenocodes found to be significantly associated with the set  
679 of SNPs associated with both single and recurrent AF/MI or uniquely for one of them.

680 Additional File 3 - Excel file containing genes shared between the GWAS associated genes (target genes)  
681 in the network analysis for genes associated with both single and recurrent AF/MI or uniquely for one of  
682 them.

683 Additional File 4 - Excel file containing allele frequency of SNPs identified in only one of the populations  
684 (listed as for instance –? in Tab. 2 and 3). The columns named 'AF HUNT', 'AF UKBB' and 'AF  
685 European' shows the allele frequency in the HUNT population, the UKBB population and as reported in  
686 gnomAD (37)(<https://gnomad.broadinstitute.org/>), respectively. The 'HUNT/UKBB' columns shows if the

687 SNP is identified in HUNT or UKBB, and the 'imputation info' columns shows the imputation info given  
688 in the genotyped UKBB files.

## REFERENCES

- 689 1 .Shoemaker MB, Bollmann A, Lubitz SA, Ueberham L, Saini H, Montgomery J, et al. Common genetic  
690 variants and response to atrial fibrillation ablation. *Circulation: Arrhythmia and Electrophysiology* **8**  
691 (2015) 296–302. doi:10.1161/CIRCEP.114.001909.
- 692 2 .Official Statistics of Sweden H, Care M. Statistics on Myocardial Infarctions 2020. Tech. rep. (2021).
- 693 3 .[Dataset] Nielsen JB, Thorolfsdottir RB, Fritsche LG, Zhou W, Skov MW, Graham SE, et al. Biobank-  
694 driven genomic discovery yields new insight into atrial fibrillation biology (2018). doi:10.1038/  
695 s41588-018-0171-3.
- 696 4 .Christophersen IE, Rienstra M, Roselli C, Yin X, Geelhoed B, Barnard J, et al. Large-scale analyses of  
697 common and rare variants identify 12 new loci associated with atrial fibrillation. *Nature Genetics* **49**  
698 (2017) 946–952. doi:10.1038/ng.3843.
- 699 5 .Nikpay M, Goel A, Won HH, Hall LM, Willenborg C, Kanoni S, et al. A comprehensive 1,000  
700 Genomes-based genome-wide association meta-analysis of coronary artery disease. *Nature genetics* **47**  
701 (2015) 1121–1130. doi:10.1038/ng.3396.
- 702 6 .Hartiala JA, Han Y, Jia Q, Hilser JR, Huang P, Gukasyan J, et al. Genome-wide analysis identifies  
703 novel susceptibility loci for myocardial infarction. *European Heart Journal* **42** (2021) 919–933.  
704 doi:10.1093/eurheartj/ehaa1040.
- 705 7 .Husser D, Adams V, Piorkowski C, Hindricks G, Bollmann A. Chromosome 4q25 Variants and Atrial  
706 Fibrillation Recurrence After Catheter Ablation. *Journal of the American College of Cardiology* **55**  
707 (2010) 747–753. doi:10.1016/j.jacc.2009.11.041.
- 708 8 .Wutzler A, Kestler C, Perrot A, Loehr L, Huemer M, Parwani AS, et al. Variations in the human  
709 soluble epoxide hydrolase gene and recurrence of atrial fibrillation after catheter ablation. *International*  
710 *Journal of Cardiology* **168** (2013) 3647–3651. doi:10.1016/j.ijcard.2013.05.010.
- 711 9 .Zhang X, Huang J, Li J, Lu Q, Huang Y, Lu D, et al. Association Between TCF21 Gene Polymorphism  
712 with the Incidence of Paroxysmal Atrial Fibrillation and the Efficacy of Radiofrequency Ablation for  
713 Patients with Paroxysmal Atrial Fibrillation. *International Journal of General Medicine* **Volume 15**  
714 (2022) 4975–4983. doi:10.2147/ijgm.s366956.
- 715 10 .Ulus T, Dural M, Mese P, Yetmis F, Mert KU, Gorenek B, et al. Genetic variants associated with atrial  
716 fibrillation and long-term recurrence after catheter ablation for atrial fibrillation in Turkish patients.  
717 *Anatolian Journal of Cardiology* **25** (2021) 129–138. doi:10.14744/AnatJCardiol.2020.44082.
- 718 11 .Verweij N, Eppinga RN, Hagemeyer Y, van der Harst P. Identification of 15 novel risk loci for coronary  
719 artery disease and genetic risk of recurrent events, atrial fibrillation and heart failure. *Scientific Reports*  
720 **7** (2017) 2761. doi:10.1038/s41598-017-03062-8.
- 721 12 .Tragante V, Doevendans PA, Nathoe HM, van der Graaf Y, Spiering W, Algra A, et al. The impact of  
722 susceptibility loci for coronary artery disease on other vascular domains and recurrence risk. *European*  
723 *Heart Journal* **34** (2013) 2896–2904. doi:10.1093/eurheartj/ehs222.
- 724 13 .Wauters E, Carruthers KF, Buyschaert I, Dunbar DR, Peuteman G, Belmans A, et al. Influence of  
725 23 coronary artery disease variants on recurrent myocardial infarction or cardiac death: the GRACE  
726 Genetics Study. *European Heart Journal* **34** (2013) 993–1001. doi:10.1093/eurheartj/ehs389.
- 727 14 .Åsvold BO, Langhammer A, Rehn TA, Kjølsvik G, Grøntvedt TV, Sørgerd EP, et al. Cohort Profile  
728 Update: The HUNT Study, Norway. *International Journal of Epidemiology* (2022). doi:10.1093/ije/  
729 dyac095.



- 730 **15** .Sudlow C, Gallacher J, Allen N, Beral V, Burton P, Danesh J, et al. UK Biobank: An Open Access  
731 Resource for Identifying the Causes of a Wide Range of Complex Diseases of Middle and Old Age.  
732 *PLoS Medicine* **12** (2015). doi:10.1371/journal.pmed.1001779.
- 733 **16** .Brumpton BM, Graham S, Surakka I, Skogholt AH, Løset M, Fritsche LG, et al. The HUNT Study: a  
734 population-based cohort for genetic research. *medRxiv* (2021). doi:10.1101/2021.12.23.21268305.
- 735 **17** .Bycroft C, Freeman C, Petkova D, Band G, Elliott LT, Sharp K, et al. The UK Biobank resource with  
736 deep phenotyping and genomic data. *Nature* **562** (2018) 203–209. doi:10.1038/s41586-018-0579-z.
- 737 **18** .Zhao Lq, Zhang Gb, Wen Zj, Huang Ck, Wu Hq, Xu J, et al. Common variants predict recurrence after  
738 nonfamilial atrial fibrillation ablation in Chinese Han population. *International Journal of Cardiology*  
739 **227** (2017) 360–366. doi:10.1016/j.ijcard.2016.11.057.
- 740 **19** .McCarthy S, Das S, Kretzschmar W, Delaneau O, Wood AR, Teumer A, et al. A reference panel of  
741 64,976 haplotypes for genotype imputation. *Nature Genetics* **48** (2016) 1279–1283. doi:10.1038/ng.  
742 3643.
- 743 **20** .Zhou W, Nielsen JB, Fritsche LG, Dey R, Gabrielsen ME, Wolford BN, et al. Efficiently controlling  
744 for case-control imbalance and sample relatedness in large-scale genetic association studies. *Nature*  
745 *Genetics* **50** (2018) 1335–1341. doi:10.1038/s41588-018-0184-y.
- 746 **21** .Willer CJ, Li Y, Abecasis GR. METAL: Fast and efficient meta-analysis of genomewide association  
747 scans. *Bioinformatics* **26** (2010) 2190–2191. doi:10.1093/bioinformatics/btq340.
- 748 **22** .Watanabe K, Taskesen E, Van Bochoven A, Posthuma D. Functional mapping and annotation of genetic  
749 associations with FUMA. *Nature Communications* **8** (2017). doi:10.1038/s41467-017-01261-5.
- 750 **23** .Sollis E, Mosaku A, Abid A, Buniello A, Cerezo M, Gil L, et al. The NHGRI-EBI GWAS Catalog:  
751 knowledgebase and deposition resource. *Nucleic Acids Research* (2022). doi:10.1093/nar/gkac1010.
- 752 **24** .[Dataset] PAN-UKB team. <https://pan.ukbb.broadinstitute.org> (2020).
- 753 **25** .Mi H, Muruganujan A, Casagrande JT, Thomas PD. Large-scale gene function analysis with the  
754 PANTHER classification system. *Nature Protocols* **8** (2013) 1551–1566. doi:10.1038/nprot.2013.092.
- 755 **26** .Stuart JM, Segal E, Koller D, Kim SK. A Gene-Coexpression Network for Global Discovery of  
756 Conserved Genetic Modules. *Science* **302** (2003) 249–255. doi:10.1126/science.1087447.
- 757 **27** .Horvath S, Zhang B, Carlson M, Lu KV, Zhu S, Felciano RM, et al. Analysis of oncogenic signaling  
758 networks in glioblastoma identifies *ASPM* as a molecular target. *Proceedings of the National*  
759 *Academy of Sciences* **103** (2006) 17402–17407. doi:10.1073/pnas.0608396103.
- 760 **28** .Nowick K, Gernat T, Almaas E, Stubbs L. Differences in human and chimpanzee gene expression  
761 patterns define an evolving network of transcription factors in brain. *Proceedings of the National*  
762 *Academy of Sciences of the United States of America* **106** (2009) 22358–63. doi:10.1073/pnas.  
763 0911376106.
- 764 **29** .van Dam S, Vösa U, van der Graaf A, Franke L, de Magalhães JP. Gene co-expression analysis for  
765 functional classification and gene-disease predictions. *Briefings in Bioinformatics* **19** (2018) 575–592.  
766 doi:10.1093/bib/bbw139.
- 767 **30** .Aguet F, Anand S, Ardlie KG, Gabriel S, Getz GA, Graubert A, et al. The GTEx Consortium atlas of  
768 genetic regulatory effects across human tissues. *Science* **369** (2020) 1318–1330. doi:10.1126/science.  
769 aaz1776.
- 770 **31** .Langfelder P, Horvath S. WGCNA: An R package for weighted correlation network analysis. *BMC*  
771 *Bioinformatics* **9** (2008). doi:10.1186/1471-2105-9-559.
- 772 **32** .Csardi G, Nepusz T. The igraph software package for complex network research. *InterJournal Complex*  
773 *Systems* (2006) 1695.

- 774 **33** .Csárdi G, Nepusz T, Traag V, Horvát S, Zanini F, Noom D, et al. {igraph}: Network Analysis and  
775 Visualization in R. Tech. rep. (2023). doi:10.5281/zenodo.7682609.
- 776 **34** .Shannon P, Markiel A, Ozier O, Baliga NS, Wang JT, Ramage D, et al. Cytoscape: a software  
777 environment for integrated models of biomolecular interaction networks. *Genome research* **13** (2003)  
778 2498–2504.
- 779 **35** .Husser D, Büttner P, Stübner D, Ueberham L, Platonov PG, Dinov B, et al. PR interval associated  
780 genes, atrial remodeling and rhythm outcome of catheter ablation of atrial fibrillation-A gene-based  
781 analysis of GWAS data. *Frontiers in Genetics* **8** (2017). doi:10.3389/fgene.2017.00224.
- 782 **36** .Hong M, Hwang I, Yu HT, Kim TH, Uhm JS, Joung B, et al. Potential causal association  
783 of a prolonged PR interval and clinical recurrence of atrial fibrillation after catheter ablation: a  
784 Mendelian randomization analysis. *Journal of Human Genetics* **65** (2020) 813–821. doi:10.1038/  
785 s10038-020-0774-2.
- 786 **37** .Chen S, Francioli LC, Goodrich JK, Collins RL, Kanai M, Wang Q, et al. A genomic mutational  
787 constraint map using variation in 76,156 human genomes. *Nature* **625** (2024) 92–100. doi:10.1038/  
788 s41586-023-06045-0.
